# Supplementary material
Source: MDPI journal article supplement (https://www.mdpi.com/2075-163X/8/11/476)
Supplement: s1 [file s1]

## Sheet: Table S1a
Table S1a: Compositions of magnetite matrices determined by WDS
Sample	LDC-04	LDC-04	LDC-04	LDC-04	LDC-04	LDC-04	LDC-07.1	LDC-07.1	LDC-07.1	LDC-07.1	LDC-10	LDC-10	LDC-10	LDC-10	LDC-20	LDC-20	LDC-25	LDC-25	LDC-25	LDC-26.2	LDC-26.2	LDC-29	LDC-29	LDC-29	LDC-29	LDC-30	LDC-30	LDC-30	LDC-35.1	LDC-35.1	LDC-35.1	LDC-38.2	LDC-38.2	LDC-40.1	LDC-40.1	LDC-40.1	LDC-40.1	LDC-40.2	LDC-40.2	LDC-40.2	LDC-47.1	LDC-47.1	LDC-47.1	LDC-51	LDC-51	LDC-51	LDC-54.1	LDC-54.1	LDC-54.2
Location (m)a	118.3	118.3	118.3	118.3	118.3	118.3	115.6	115.6	115.6	115.6	112.6	112.6	112.6	112.6	91.5	91.5	87.8	87.8	87.8	86.3	86.3	83.8	83.8	83.8	83.8	82.9	82.9	82.9	79.2	79.2	79.2	72.9	72.9	68.6	68.6	68.6	68.6	68.3	68.3	68.3	60.6	60.6	60.6	55.9	55.9	55.9	53.3	53.3	52.6
Grain #	1	2	3	4	5	6	7	8	9	10	11	12	13	14	15	16	17	18	19	20	21	22	23	24	25	26	27	28	29	30	31	32	33	34	35	36	37	38	39	40	41	42	43	44	45	46	47	48	49
SiO2 (wt %)	0.141	0.048	bdl	0.04	0.035	bdl	0.049	bdl	0.05	bdl	bdl	0.038	bdl	bdl	bdl	0.034	bdl	bdl	bdl	bdl	bdl	bdl	bdl	bdl	bdl	bdl	bdl	bdl	bdl	bdl	bdl	bdl	0.028	0.035	0.027	bdl	0.049	bdl	0.029	bdl	0.043	bdl	bdl	0.059	bdl	0.068	0.03	0.063	0.057
TiO2	1.011	0.643	1.685	0.451	0.13	0.597	0.828	0.223	0.141	0.947	0.59	0.707	0.944	0.422	0.861	1.275	1.085	0.957	0.898	1.249	1.353	0.475	1.015	1.173	0.972	0.904	0.876	0.945	1.211	1.02	0.969	0.746	1.524	1.442	0.705	1.825	1.088	0.621	0.322	0.749	0.051	0.701	1.541	0.722	0.448	0.507	0.705	1.051	0.616
Al2O3	0.382	0.248	0.198	0.22	0.241	0.221	0.183	0.253	0.262	0.163	0.203	0.64	0.267	0.21	0.145	0.12	0.184	0.261	0.138	0.247	0.239	0.281	0.284	0.249	0.18	0.331	0.254	0.246	0.171	0.189	0.195	0.16	0.164	0.158	0.196	0.135	0.197	0.092	0.097	0.298	0.393	0.35	0.352	0.309	0.352	0.496	0.341	0.653	0.471
Cr2O3	bdl	bdl	bdl	bdl	bdl	bdl	bdl	bdl	bdl	bdl	bdl	bdl	bdl	bdl	bdl	bdl	bdl	bdl	bdl	bdl	bdl	bdl	bdl	bdl	bdl	bdl	bdl	bdl	bdl	bdl	bdl	bdl	bdl	bdl	bdl	bdl	bdl	bdl	bdl	bdl	bdl	bdl	bdl	bdl	bdl	bdl	bdl	bdl	bdl
V2O3	1.247	0.927	1.114	0.973	1.178	0.976	1.48	1.183	1.308	1.134	1.335	1.156	1.317	1.556	1.182	1.04	1.188	1.13	1.555	1.146	1.064	0.92	0.977	1.123	1.163	1.128	0.925	0.861	1.097	1.102	1.205	1.636	1.735	1.435	1.238	1.398	0.906	1.41	0.97	1.51	1.309	1.286	1.27	1.279	1.323	1.219	1.321	1.355	1.568
FeO	31.7165	31.381	32.2946	30.9276	30.8588	31.2346	32.2835	31.4753	31.1979	31.8462	31.6894	32.029	31.9975	31.8162	31.8582	31.6348	32.0612	31.6179	31.44	32.5264	32.4507	31.2384	31.6242	32.1137	31.3837	31.456	31.8002	31.6956	31.6324	32.0272	31.9015	31.8803	32.8691	32.1469	31.8	32.4196	31.4018	31.7426	31.4545	32.313	30.9507	31.8702	32.3871	32.0998	31.5379	31.9069	31.8331	31.7683	31.3393
Fe2O3	64.4513	65.8629	63.8208	65.518	66.4507	65.8868	66.6095	67.4493	66.5781	65.4756	66.3309	66.0814	65.759	67.0199	66.0064	64.6175	65.5399	64.876	64.3247	65.6469	65.0702	66.4619	65.1744	65.3458	64.7666	64.9617	65.9358	65.5209	64.1575	65.902	65.5222	65.9599	64.9203	63.9124	66.0339	63.2961	64.0599	66.4729	67.4566	66.7025	66.7043	66.2268	64.1995	66.2109	66.4809	66.7088	65.9806	64.0425	64.6959
MnO	bdl	bdl	bdl	bdl	bdl	bdl	bdl	bdl	bdl	bdl	bdl	bdl	bdl	bdl	bdl	bdl	bdl	bdl	bdl	bdl	bdl	bdl	bdl	bdl	bdl	bdl	bdl	bdl	bdl	bdl	bdl	bdl	bdl	bdl	bdl	bdl	bdl	bdl	bdl	bdl	bdl	bdl	bdl	bdl	bdl	bdl	bdl	bdl	bdl
MgO	0.042	bdl	bdl	bdl	bdl	bdl	bdl	0.033	bdl	bdl	bdl	0.026	bdl	bdl	bdl	bdl	bdl	0.025	bdl	bdl	0.049	0.06	0.076	0.036	0.052	0.027	0.039	bdl	bdl	bdl	bdl	bdl	0.025	bdl	bdl	bdl	0.034	bdl	bdl	bdl	0.05	bdl	bdl	bdl	0.036	0.037	bdl	0.044	bdl
CaO	bdl	bdl	bdl	bdl	bdl	bdl	bdl	bdl	bdl	bdl	bdl	bdl	bdl	bdl	bdl	0.103	bdl	bdl	bdl	bdl	bdl	bdl	bdl	bdl	bdl	bdl	bdl	bdl	bdl	bdl	bdl	bdl	bdl	bdl	bdl	bdl	bdl	bdl	bdl	bdl	bdl	bdl	bdl	bdl	bdl	bdl	bdl	bdl	bdl
Na2O	bdl	bdl	0.055	bdl	bdl	bdl	bdl	bdl	0.049	bdl	bdl	bdl	bdl	bdl	bdl	bdl	bdl	bdl	0.053	bdl	0.136	bdl	0.038	0.053	0.045	bdl	bdl	bdl	0.042	bdl	bdl	bdl	bdl	bdl	bdl	bdl	bdl	bdl	bdl	bdl	bdl	bdl	bdl	bdl	bdl	bdl	bdl	0.064	bdl
NiO	bdl	bdl	bdl	bdl	bdl	bdl	bdl	bdl	bdl	bdl	bdl	bdl	bdl	bdl	bdl	bdl	bdl	bdl	bdl	bdl	bdl	bdl	bdl	bdl	bdl	bdl	bdl	bdl	bdl	bdl	bdl	bdl	bdl	bdl	bdl	bdl	bdl	bdl	bdl	bdl	bdl	bdl	bdl	bdl	bdl	bdl	bdl	bdl	bdl
CaO	0.149	bdl	bdl	bdl	bdl	bdl	bdl	bdl	bdl	bdl	bdl	bdl	bdl	bdl	bdl	bdl	bdl	bdl	bdl	bdl	bdl	bdl	bdl	bdl	bdl	bdl	bdl	bdl	bdl	bdl	bdl	bdl	bdl	bdl	bdl	bdl	bdl	bdl	bdl	bdl	bdl	bdl	bdl	bdl	bdl	bdl	bdl	bdl	bdl
ZnO	bdl	bdl	bdl	bdl	bdl	bdl	n.a.	n.a.	n.a.	bdl	bdl	bdl	bdl	bdl	bdl	bdl	n.a.	n.a.	n.a.	n.a.	n.a.	bdl	bdl	bdl	bdl	bdl	bdl	bdl	n.a.	n.a.	n.a.	n.a.	n.a.	bdl	bdl	bdl	bdl	bdl	bdl	bdl	bdl	bdl	bdl	bdl	bdl	bdl	bdl	bdl	bdl
Totalb	99.2788	99.3539	99.3504	98.2816	99.0495	99.1505	101.591	100.631	99.726	99.7128	100.303	100.74	100.447	101.13	100.19	99.1393	100.222	99.0799	98.6887	100.969	100.712	99.5773	99.2826	100.154	98.7203	99.0037	99.994	99.3526	98.4318	100.381	99.8638	100.612	101.39	99.3613	100.057	99.2227	97.7637	100.425	100.436	101.644	99.6049	100.591	99.9896	100.817	100.518	101.039	100.294	99.2147	98.8402
FeOTotal	89.7178	90.6527	89.7285	89.8889	90.6594	90.5279	92.227	92.1746	91.1132	90.7693	91.3822	91.4973	91.1757	92.1291	91.2589	89.7857	91.0422	90.0014	89.3274	91.6037	91.009	91.0492	90.2763	90.92	89.6688	89.9166	91.1375	90.6595	89.3693	91.3341	90.8666	91.2393	91.2925	89.6633	91.2256	89.3813	89.0509	91.5632	92.1604	92.3402	90.9795	91.4694	90.1619	91.6847	91.3657	91.9399	91.2107	89.4017	89.5607
Fe2O3 (mol. %)	93.1983	95.7189	92.7015	96.1582	96.8798	96.1068	94.5857	96.9115	96.5424	94.9144	95.4792	94.6006	94.5846	95.7749	95.1761	93.1979	94.1778	94.4737	94.2775	93.8975	93.3335	96.4429	94.8193	94.1371	94.6508	94.6034	95.127	95.1395	94.1904	94.4925	94.652	94.5295	92.421	92.7141	95.3865	92.0097	94.6805	95.6103	97.0312	94.8325	96.4943	94.818	92.4648	94.8114	95.4034	95.2487	95.0185	92.8734	94.3961
Fe2TiO4	3.48145	2.05526	4.98684	1.48249	0.515207	1.78301	2.54011	0.693718	0.601221	2.77838	1.77999	2.16717	2.74769	1.24338	2.5644	3.84751	3.20015	2.88243	2.67291	3.60165	3.93567	1.37737	2.97914	3.39468	2.84897	2.70554	2.52992	2.77023	3.63254	2.94699	2.82998	2.24144	4.4459	4.32448	2.13866	5.334	3.40689	1.86432	1.03876	2.13926	0.313544	2.08401	4.51617	2.29048	1.3405	1.70523	2.14381	3.2947	2.01823
FeV2O4c	1.93116	1.43701	1.72633	1.52524	1.83278	1.51685	2.24395	1.81079	2.0206	1.75157	2.05017	1.7631	2.01808	2.36949	1.81788	1.61583	1.82552	1.75592	2.42799	1.74689	1.62762	1.42224	1.51489	1.72676	1.81482	1.75336	1.4242	1.33433	1.71658	1.6908	1.85833	2.50452	2.63402	2.22255	1.90514	2.16885	1.427	2.16403	1.48982	2.28707	2.02269	1.96731	1.95391	1.95114	2.02625	1.85495	2.02686	2.09736	2.43875
Hc+Ghnd	0.539394	0.108973	0	0.407853	0.419722	0.128784	-	-	-	0.222852	0.338338	1.28745	0.190651	0.356831	0.0900795	0.214575	-	-	-	-	-	0.293601	0.248405	0.356955	0.0833313	0.406489	0.351565	0.433629	-	-	-	-	-	0.145333	0.391888	0.18671	0.256957	0.127653	0.183317	0.621918	0.605358	0.709538	0.620317	0.556787	0.587447	0.755454	0.734907	1.17042	0.846192
a Stratigraphic location as in Figure 2; b the total takes into account values below detection limit; c FeV2O4 = coulsonite component; d FeAl2O4 + ZnAl2O4; e DL = average detection limit.
bdl = below detection limit.
[truncated: 9 more columns]

## Sheet: Table S1b
Table S1b: Compositions of ilmenite determined by WDS
Sample	LDC-04	LDC-04	LDC-04	LDC-04	LDC-07.1	LDC-07.1	LDC-10	LDC-10	LDC-10	LDC-10	LDC-40.1	LDC-47.1	LDC-47.1	LDC-47.1	LDC-51	LDC-51	LDC-51	LDC-54.1	LDC-54.1	LDC-54.2	LDC-54.2	LDC-54.2	LDC-58	LDC-58	LDC-72.1	LDC-72.1	LDC-72.1	Avg. A (n=27)	LDC-20	LDC-20	LDC-25	LDC-26.2	LDC-26.2	LDC-26.2	LDC-29	LDC-29	LDC-29	LDC-30	LDC-30	LDC-30	LDC-35.1	LDC-35.1	LDC-35.1	LDC-38.2	LDC-38.2	LDC-38.2	LDC-40.1	LDC-40.1	LDC-40.2
Location (m)a	118.3	118.3	118.3	118.3	115.6	115.6	112.6	112.6	112.6	112.6	68.6	60.6	60.6	60.6	55.9	55.9	55.9	53.3	53.3	52.6	52.6	52.6	49.4	49.4	35.7	35.7	35.7	-	91.5	91.5	87.8	86.3	86.3	86.3	83.8	83.8	83.8	82.9	82.9	82.9	79.2	79.2	79.2	72.9	72.9	72.9	68.6	68.6	68.3
Type	A - Ilmenite-E1																												B - Ilmenite-E2
Grain #	57	58	59	60	61	62	63	64	65	66	67	68	69	70	71	72	73	74	75	76	77	78	79	80	81	82	83	-	84	85	86	87	88	89	90	91	92	93	94	95	96	97	98	99	100	101	102	103	104
SiO2 (wt %)	bdl	0.028	bdl	bdl	bdl	bdl	bdl	bdl	0.046	bdl	bdl	bdl	0.037	0.031	bdl	0.029	0.05	bdl	bdl	bdl	bdl	bdl	bdl	bdl	bdl	bdl	0.028	bdl	bdl	bdl	bdl	bdl	bdl	bdl	bdl	bdl	bdl	bdl	0.031	bdl	bdl	bdl	bdl	bdl	bdl	bdl	bdl	bdl	bdl
TiO2	51.482	51.672	51.795	51.625	51.853	52.092	52.096	51.731	51.491	51.373	53.345	51.596	51.416	51.767	51.585	51.915	51.381	51.478	51.593	51.439	51.918	52.123	51.867	51.588	51.508	50.912	51.333	51.7027	51.943	52.655	52.377	51.636	51.319	52.165	51.81	51.294	51.467	51.175	51.129	50.867	52.337	51.625	53.006	51.617	51.924	51.655	52.813	52.117	51.502
Al2O3	0.03	0.052	0.026	bdl	bdl	0.039	bdl	0.044	bdl	bdl	0.029	bdl	0.046	0.031	0.033	bdl	0.037	0.036	0.027	0.041	bdl	0.043	0.04	0.029	0.031	bdl	0.041	0.0303333	0.041	0.043	0.039	0.029	0.027	0.026	0.038	0.046	0.039	0.026	0.04	bdl	bdl	0.038	0.026	0.044	0.029	0.044	bdl	bdl	0.039
Cr2O3	bdl	bdl	bdl	bdl	bdl	bdl	bdl	bdl	bdl	bdl	bdl	bdl	bdl	bdl	bdl	bdl	bdl	bdl	bdl	bdl	bdl	bdl	bdl	bdl	bdl	bdl	bdl	bdl	bdl	bdl	bdl	bdl	bdl	bdl	bdl	bdl	bdl	bdl	bdl	bdl	bdl	bdl	bdl	bdl	bdl	bdl	bdl	bdl	bdl
V2O3	bdl	bdl	bdl	bdl	bdl	bdl	bdl	bdl	bdl	bdl	bdl	bdl	bdl	bdl	0.395	bdl	bdl	bdl	bdl	bdl	bdl	bdl	bdl	bdl	bdl	bdl	bdl	bdl	0.468	bdl	bdl	bdl	bdl	bdl	bdl	bdl	bdl	bdl	bdl	0.477	bdl	bdl	bdl	bdl	bdl	bdl	bdl	bdl	bdl
FeO	44.1802	44.5927	44.7332	44.534	43.7849	44.5685	45.6721	45.3861	45.1658	45.1247	44.295	44.8662	44.8453	45.2315	44.9153	45.0167	44.5904	45.0328	44.9547	45.1988	45.2659	45.7492	45.404	45.2712	45.2705	44.575	44.966	44.933	45.5626	44.191	45.158	45.313	45.029	45.5504	43.7044	43.2103	43.4893	44.5905	44.4733	44.3362	44.656	45.4413	45.029	45.4672	45.7724	45.4362	45.087	45.37	45.4365
Fe2O3	2.17148	1.11812	0.733757	1.36348	2.67534	0.767399	0.656828	2.36276	2.09387	2.13751	7.89657e-15	1.88368	1.69347	1.42104	2.09299	1.45912	2.65008	1.26867	2.35301	1.29932	0.839706	0.170576	1.71729	1.55312	1.59644	3.57029	2.37509	1.63053	0.381812	0	0	2.97041	2.55207	0.700242	1.77838	2.28858	2.16182	2.86568	1.98904	2.54246	0	1.3706	0	2.33051	1.73163	1.03516	0	0	1.15998
MnO	1.957	1.709	1.625	1.736	2.45	2.105	1.058	0.92	0.998	0.883	1.011	0.94	0.919	0.876	1.002	1.194	1.174	0.999	0.914	0.79	1.024	0.998	1.017	0.953	0.864	0.985	0.955	1.18726	0.923	1.115	0.998	0.812	0.718	0.927	0.859	0.974	0.971	1.067	0.877	0.918	0.926	0.846	0.967	0.859	0.833	0.835	0.92	0.889	0.704
MgO	0.082	0.072	0.085	0.064	0.07	0.068	0.054	0.084	0.076	0.085	0.052	0.282	0.246	0.249	0.248	0.274	0.259	0.096	0.184	0.139	0.126	0.07	0.069	0.08	0.089	0.099	0.144	0.12763	0.092	0.067	0.045	0.17	0.174	0.239	1.06	1.026	0.984	0.194	0.345	0.231	0.05	0.031	0.047	0.028	bdl	0.044	0.025	0.046	0.063
CaO	bdl	bdl	bdl	bdl	bdl	bdl	bdl	bdl	bdl	bdl	bdl	bdl	bdl	bdl	bdl	bdl	bdl	bdl	bdl	bdl	bdl	bdl	bdl	bdl	bdl	bdl	bdl	bdl	bdl	bdl	bdl	bdl	bdl	bdl	bdl	bdl	bdl	bdl	bdl	bdl	0.075	0.032	0.026	bdl	bdl	bdl	bdl	bdl	bdl
Na2O	bdl	bdl	bdl	bdl	bdl	bdl	bdl	bdl	bdl	bdl	bdl	bdl	bdl	bdl	bdl	bdl	bdl	bdl	bdl	bdl	bdl	0.048	bdl	bdl	bdl	bdl	bdl	bdl	bdl	bdl	bdl	bdl	bdl	bdl	bdl	bdl	bdl	bdl	bdl	bdl	bdl	bdl	bdl	bdl	bdl	0.045	bdl	bdl	bdl
NiO	bdl	bdl	bdl	bdl	bdl	bdl	bdl	bdl	bdl	bdl	bdl	bdl	bdl	bdl	bdl	bdl	bdl	bdl	bdl	bdl	bdl	bdl	bdl	bdl	bdl	bdl	bdl	bdl	bdl	bdl	bdl	bdl	bdl	bdl	bdl	bdl	bdl	bdl	bdl	bdl	bdl	bdl	bdl	bdl	bdl	bdl	bdl	bdl	bdl
CaO	bdl	bdl	bdl	bdl	bdl	bdl	bdl	bdl	bdl	bdl	bdl	bdl	bdl	bdl	bdl	bdl	bdl	bdl	bdl	bdl	bdl	bdl	bdl	bdl	bdl	bdl	bdl	bdl	bdl	bdl	bdl	bdl	bdl	bdl	bdl	bdl	bdl	bdl	bdl	bdl	bdl	bdl	bdl	bdl	bdl	bdl	bdl	bdl	bdl
ZnO	bdl	bdl	bdl	bdl	bdl	bdl	bdl	bdl	bdl	bdl	bdl	bdl	bdl	bdl	bdl	bdl	bdl	bdl	bdl	bdl	bdl	bdl	bdl	bdl	bdl	bdl	bdl	bdl	bdl	bdl	bdl	bdl	bdl	bdl	bdl	bdl	bdl	bdl	bdl	bdl	bdl	bdl	bdl	bdl	bdl	bdl	bdl	bdl	bdl
Totalb	100.063	99.4568	99.21	99.7765	101.146	99.8679	99.7539	100.779	100.102	99.7902	98.858	99.9789	99.4108	99.7725	100.322	100.103	100.424	99.3975	100.342	99.0161	99.6136	99.4618	100.444	99.8453	99.604	100.431	100.077	99.8906	99.4724	98.377	99.031	101.261	100.045	99.9216	99.5238	99.2679	99.5071	100.293	99.2493	99.4647	98.162	99.7639	99.68	100.887	100.415	99.6194	99.133	98.524	99.3175
FeOTotal	46.1341	45.5988	45.3935	45.7609	46.1922	45.259	46.2631	47.5122	47.0499	47.048	44.295	46.5612	46.3691	46.5101	46.7986	46.3296	46.975	46.1744	47.072	46.368	46.0215	45.9027	46.9492	46.6687	46.707	47.7875	47.1032	46.4002	45.9061	44.191	45.158	47.9858	47.3253	46.1805	45.3046	45.2696	45.4345	47.1691	46.263	46.6239	44.656	46.6746	45.029	47.5642	47.3306	46.3676	45.087	45.37	46.4803
a Stratigraphic location as in Figure 2; b the total takes into account values below detection limit; c Ilmenite derived from primary crystallization; d DL = average detection limit.
bdl = below detection limit.
[truncated: 10 more columns]

## Sheet: Table S2
Table S2: Compositions of spinel exsolutions determined by EDS
Sample	LDC-08	LDC-08	LDC-10	LDC-12.1	LDC-48	LDC-50	LDC-93.2	LDC-43	LDC-61.2	LDC-93.1	LDC-62	LDC-52.2	LDC-53	LDC-54.2	LDC-64	LDC-61.1	LDC-49	LDC-50	LDC-61.1	LDC-66	LDC-58	LDC-59	LDC-63	LDC-52.1	LDC-64	LDC-58	LDC-93.2	LDC-56.2	LDC-61.2	LDC-62	LDC-04	LDC-61.2	LDC-62	LDC-10	LDC-07.1	LDC-61.2	LDC-10	LDC-93.1	LDC-64	LDC-68	LDC-52.1	LDC-38.1	LDC-59	LDC-47.1	LDC-56.2	LDC-53	LDC-10	LDC-68	LDC-52.2
Location (m)a	114.7	114.7	112.6	110.7	59.1	57.1	1.1	65.6	46.3	1.5	45.1	54.6	53.9	52.6	43	46.8	57.9	57.2	46.8	41.3	49.4	48.3	44.1	54.8	43	49.4	1.1	50.7	46.3	45.1	118.3	46.3	45.1	112.6	115.6	46.3	112.6	1.5	43	39.4	54.8	73.5	48.3	60.6	50.7	53.9	112.6	39.4	54.6
Type	A - Spinels within titanomagnetite hosting Ilmenite-E1
Seriesb	LT	LT	LT	LT	LT	LT	LT	LT	LT	LT	LT	LT	LT	LT	LT	LT	LT	LT	LT	LT	LT	LT	LT	LT	LT	LT	LT	LT	LT	LT	LT	LT	LT	LT	LT	LT	LT	LT	LT	LT	LT	LT	LT	LT	LT	LT	LT	LT	LT
Grain #	1	2	3	4	5	6	7	8	9	10	11	12	13	14	15	16	17	18	19	20	21	22	23	24	25	26	27	28	29	30	31	32	33	34	35	36	37	38	39	40	41	42	43	44	45	46	47	48	49
TiO2 (wt %)	<0.1	<0.1	<0.1	<0.1	<0.1	<0.1	<0.1	0.11	0.11	0.11	0.12	0.13	0.13	0.13	0.13	0.14	0.15	0.16	0.16	0.16	0.17	0.17	0.17	0.18	0.18	0.19	0.19	0.2	0.2	0.25	0.5	0.53	0.55	0.59	0.61	0.63	0.66	0.79	0.83	0.83	0.88	1	1.07	1.1	1.11	1.15	1.18	1.19	1.22
Al2O3	58.45	57.37	58.11	56.07	57.21	59.12	55.99	58.26	58.85	56.41	58.17	55.52	55.08	55.97	53.26	54.86	57.51	58.68	55.23	57.95	55.01	57.03	57.91	54.01	58.16	55.61	56.6	55.11	58.65	57.86	58.03	58.21	58.18	58.03	57.61	54.25	57.99	54.59	58.92	55.64	54.33	58.3	55.85	55.27	53.2	54.65	57.49	55.66	57.93
Cr2O3	<0.1	<0.1	<0.1	<0.1	<0.1	<0.1	0.23	<0.1	<0.1	0.29	<0.1	<0.1	0.18	0.2	<0.1	<0.1	<0.1	<0.1	<0.1	<0.1	<0.1	<0.1	<0.1	0.11	<0.1	<0.1	0.3	<0.1	<0.1	<0.1	<0.1	<0.1	<0.1	0.25	<0.1	<0.1	<0.1	0.18	<0.1	0.33	0.33	<0.1	0.12	<0.1	0.32	0.33	<0.1	0.27	<0.1
V2O3	0.35	0.37	0.26	0.28	0.34	0.33	0.27	0.29	0.38	0.23	0.36	0.41	0.45	0.38	0.4	0.38	0.25	0.27	0.43	0.34	0.41	0.45	0.36	0.49	0.37	0.42	0.23	0.43	0.4	0.31	<0.1	0.34	0.34	0.15	0.14	0.37	0.16	0.2	0.28	0.23	0.32	0.24	0.26	<0.1	0.27	0.3	0.19	0.18	0.33
FeO	9.53	9.76	19.25	21.4863	20.14	22.92	14.5931	16.51	33.88	14.9817	35.05	35.0236	36.2139	38.7082	30.4293	36.4355	21.382	21.88	35.1113	18.6	35.2047	36.7864	24.7	33.8885	27.64	36.5712	15.51	35.0126	38.59	34.65	9.15	28.22	30.73	15.82	14.5	28.0228	17.35	13.0915	25.11	15.29	27.8176	22.56	33.0468	23.641	30.5341	35.7677	16.15	13.85	36.49
Fe2O3	0	0	0	1.43754	0	0	0.507718	0	0	0.764812	0	4.49634	4.07383	1.99104	4.01225	4.78313	0.275537	0	3.97667	0	4.03958	1.89306	0	5.00206	0	3.4545	0	3.76409	7.89558e-15	0	0	0	3.94779e-15	0	0	2.45263	0	1.18733	0	0	1.70286	0	0.570311	1.57683	2.90678	1.65824	0	0	0
MnO	<0.1	<0.1	<0.1	<0.1	<0.1	0.15	<0.1	<0.1	<0.1	<0.1	<0.1	0.31	0.26	0.29	<0.1	0.36	0.12	<0.1	0.31	<0.1	0.33	0.31	<0.1	0.22	<0.1	0.41	<0.1	0.3	<0.1	<0.1	<0.1	<0.1	<0.1	<0.1	0.26	<0.1	<0.1	<0.1	<0.1	<0.1	0.13	0.2	0.25	<0.1	0.28	0.28	<0.1	<0.1	0.32
MgO	<0.1	<0.1	<0.1	1.34	<0.1	<0.1	<0.1	<0.1	<0.1	<0.1	<0.1	2.03	1.2	<0.1	<0.1	1.23	1.32	1.58	1.2	<0.1	1.29	1.2	<0.1	0.87	<0.1	1.44	<0.1	1.4	<0.1	<0.1	<0.1	<0.1	<0.1	<0.1	<0.1	<0.1	<0.1	0.74	<0.1	<0.1	<0.1	<0.1	1.23	2.28	1.23	<0.1	<0.1	<0.1	<0.1
CoO	<0.1	<0.1	<0.1	<0.1	<0.1	0.32	<0.1	<0.1	<0.1	<0.1	<0.1	<0.1	0.43	<0.1	<0.1	<0.1	0.3	<0.1	0.43	<0.1	0.55	0.5	<0.1	0.41	<0.1	<0.1	<0.1	<0.1	<0.1	<0.1	<0.1	<0.1	<0.1	<0.1	<0.1	<0.1	<0.1	0.2	<0.1	<0.1	0.33	0.25	0.38	<0.1	0.41	0.4	<0.1	<0.1	<0.1
NiO	<0.1	<0.1	<0.1	<0.1	<0.1	<0.1	<0.1	<0.1	<0.1	<0.1	<0.1	<0.1	<0.1	<0.1	<0.1	<0.1	<0.1	<0.1	<0.1	<0.1	<0.1	<0.1	<0.1	<0.1	<0.1	<0.1	<0.1	<0.1	<0.1	<0.1	<0.1	<0.1	<0.1	<0.1	<0.1	<0.1	<0.1	<0.1	<0.1	<0.1	<0.1	<0.1	<0.1	<0.1	<0.1	<0.1	<0.1	<0.1	<0.1
ZnO	33.58	33.63	23.14	18.54	22.15	17.73	28.88	25.25	6.93	28.97	5.01	2.94	2.45	2.14	10.55	2.53	19.14	18.53	3.62	23.01	3.07	2.01	16.92	5.52	12.97	1.94	27.91	3.68	1.73	5.78	32.45	12.58	9.51	25.49	27.9	14.29	23.7	29.45	15	26.78	14.34	18.57	6.64	15.8	8.68	5.84	24.87	27.56	4.43
Totalc	101.91	101.13	100.76	99.1539	99.84	100.57	100.571	100.42	100.15	101.757	98.71	100.86	100.468	99.8093	98.7815	100.719	100.448	101.1	100.468	100.06	100.074	100.349	100.06	100.701	99.32	100.036	100.74	99.8967	99.57	98.85	100.13	99.88	99.31	100.33	101.02	100.015	99.86	100.429	100.14	99.1	100.18	101.12	99.4171	99.6678	98.9409	100.376	99.88	98.71	100.72
FeOTotal	9.53	9.76	19.25	22.78	20.14	22.92	15.05	16.51	33.88	15.67	35.05	39.07	39.88	40.5	34.04	40.74	21.63	21.88	38.69	18.6	38.84	38.49	24.7	38.39	27.64	39.68	15.51	38.4	38.59	34.65	9.15	28.22	30.73	15.82	14.5	30.23	17.35	14.16	25.11	15.29	29.35	22.56	33.56	25.06	33.15	37.26	16.15	13.85	36.49
FeAl2O4 (mol. %)	23.1039	23.9298	47.193	51.5024	49.7662	55.0023	34.9032	40.3468	81.7002	34.9837	85.594	78.7239	83.399	91.5213	71.1752	82.3645	51.0268	52.2791	81.0341	45.3897	81.6442	86.8109	60.1122	77.0486	67.3333	83.8942	37.8852	80.1322	92.9958	84.4517	21.7351	67.7476	74.0337	37.7814	34.4101	63.947	41.4654	27.8696	59.3875	36.4912	63.4629	52.2274	76.1189	51.5363	68.1723	81.5104	37.5088	32.2006	85.4684
ZnAl2O4	73.0337	73.8947	50.3158	40.6709	48.679	38.3083	63.7211	55.1781	14.8737	63.2572	10.8746	6.2645	5.28634	4.60572	23.5049	5.41918	41.3069	39.5512	7.7904	50.3393	6.60946	4.32659	36.8249	11.9444	28.2807	4.1773	61.2745	7.93319	3.71843	12.5555	71.6061	27.2536	20.6606	55.7927	60.9551	31.4505	51.9812	65.1688	32.4572	59.7895	31.5569	40.0938	14.4056	34.2877	19.1593	12.7065	54.7312	61.7999	9.48478
MgAl2O4	0	0	0	5.9399	0	0	0	0	0	0	0	8.7007	5.21679	0	0	5.3497	5.74096	6.80224	5.21679	0	5.63544	5.16399	0	3.81944	0	6.26595	0	6.12387	0	0	0	0	0	0	0	0	0	3.35274	0	0	0	0	5.38462	9.98603	5.50395	0	0	0	0
Fe2TiO4	0	0	0	0	0	0	0.209839	0.210872	0.210477	0.27959	0.280636	0.278422	0.278229	0.279135	0.278164	0.277906	0.350058	0.350631	0.347786	0.351041	0.347866	0.348918	0.350713	0.416667	0.421053	0.41773	0.420168	0.417537	0.420954	0.561141	1.12544	1.1941	1.19466	1.33677	1.33427	1.3947	1.47714	1.81607	1.83056	1.89474	1.95485	2.18054	2.37762	2.44413	2.50813	2.51338	2.60625	2.74197	2.66979
a Stratigraphic location as in Figure 2; b LT = low-Ti (<2.5 wt.% TiO2), HT = high-Ti (>2.5 wt.% TiO2); c the total takes into account values <1.
Detection limit = 0.1 wt.% (see text for details).
[truncated: 89 more columns]

## Sheet: Table S3a
Table S3a: Trace element compositions of titanomagnetite determined by LA-ICP-MS
Sample	LDC-04	LDC-04	LDC-04	LDC-04	LDC-04	LDC-07.1	LDC-07.1	LDC-07.1	LDC-07.1	LDC-10	LDC-10	LDC-12.1	LDC-12.1	LDC-12.1	LDC-38.1	LDC-38.1	LDC-41	LDC-41	LDC-41	LDC-47.1	LDC-49	LDC-51	LDC-51	LDC-52.1	LDC-52.1	LDC-52.2	LDC-52.2	LDC-54.1	LDC-54.2	LDC-54.2	LDC-56.1	LDC-56.1	LDC-56.2	LDC-56.2	LDC-58	LDC-59	LDC-59	LDC-61.2	LDC-61.2	LDC-62	LDC-63	LDC-64	LDC-65	LDC-65	LDC-67	LDC-67	LDC-67	LDC-67	LDC-68
Position (m)a	118.3	118.3	118.3	118.3	118.3	115.6	115.6	115.6	115.6	112.6	112.6	110.7	110.7	110.7	73.5	73.5	67.2	67.2	67.2	60.6	57.9	57.9	57.9	54.8	54.8	54.6	54.6	53.3	52.6	52.6	51.3	51.3	50.7	50.7	49.4	48.3	48.3	46.3	46.3	45.1	44.1	43	42.3	42.3	40.5	40.5	40.5	40.5	39.4
Type	A - Titanomagnetite hosting Ilmenite-E1
Grain #	1	2	3	4	5	6	7	8	9	10	11	12	13	14	15	16	17	18	19	20	21	22	23	24	25	26	27	28	29	30	31	32	33	34	35	36	37	38	39	40	41	42	43	44	45	46	47	48	49
Mg (ppm)	482.671	276.607	324.213	299.551	264.231	427.64	484.892	389.666	412.033	514.102	323.018	590.049	295.79	569.304	330.077	297.361	708.059	633.989	518.776	876.311	545.065	1174.26	1168.41	292.696	310.798	585.267	649.628	1121.09	589.478	477.72	1020.03	1247.28	581.286	514.102	546.818	428.274	602.711	707.373	579.252	688.78	240.603	281.558	394.057	362.931	454.824	546.169	632.786	520.906	661.659
Al	3044.54	3335.38	1513.39	8348.93	2184.39	11392	4188.77	7945.22	11669.3	14137.8	2048.26	2617.25	1435.02	3923.25	10457.3	13495.2	13553.6	10039.2	10334.6	11567.3	8330.79	11917.8	11351.1	12561.8	15247.8	10424.1	12270.8	10433.9	11639.2	10928.2	14722	12280	13728.9	9581	11830.2	8902.32	14424.2	9221.11	10857.2	11140.8	14857.2	10507.4	11138.6	10575.4	8947.97	12571.5	15819.7	11470.8	10105.3
Si	1280.93	1448.01	1786.48	625.568	486.383	1454.68	806.206	601.733	685.719	1285.26	761.753	1045.73	382.424	1386.13	467.366	309.63	136.12	77.5945	307.877	413.034	376.229	137.873	282.172	853.956	313.719	685.719	228.573	198.63	273.085	315.592	197.462	368.051	560.255	1080.78	747.785	1184.97	1100.76	1227.08	331.431	573.107	500.454	2574.24	248.142	178.836	132.425	192.482	173.836	140.753	1497.75
P	13.9232	19.1212	20.8723	11.6693	29.8884	15.131	8.471	8.35416	9.92488	8.64627	7.98263	15.2478	15.5321	15.5321	10.1068	12.3852	6.54312	6.25568	9.11363	1.46052	13.5536	9.28889	10.691	7.67322	6.71838	10.6226	10.755	4.20629	5.47372	2.599	13.7873	15.0725	6.96375	10.282	7.01049	4.81206	4.3489	7.87975	4.63161	9.46416	7.4587	12.5618	6.31185	4.64106	6.99253	6.85719	4.09025	4.75191	19.8498
Ca	66.2125	99.0093	174.437	41.504	12.995	119.762	bdl	bdl	16.8422	bdl	48.2671	23.9525	14.3564	17.3266	bdl	93.4731	21.0899	bdl	bdl	31.5472	16.942	13.0278	15.8904	19.8019	19.5125	13.6542	18.5866	31.6056	13.5941	30.631	28.4509	18.1104	183.441	144.299	27.2241	138.948	23.6994	33.2032	16.7219	42.9976	15.3986	434.404	28.7746	26.7325	bdl	bdl	bdl	23.4588	65.5643
Sc	4.76482	4.89477	5.73237	3.74739	4.90096	7.18575	8.29574	8.58785	4.73988	2.02136	2.25865	25.1209	19.3687	18.0073	13.3783	5.84207	27.9835	25.3235	23.193	28.2172	13.7289	29.5609	30.1451	3.83042	6.71838	9.56397	20.6317	25.5883	10.1655	4.96903	24.712	27.4577	8.58785	4.32313	5.17608	3.75341	3.97597	2.97746	3.72935	19.3373	6.19553	3.83661	15.4083	10.1732	19.8204	20.0122	29.113	27.128	1.38347
Ti	84776.8	71163	90226.2	86617.1	84157.9	95225.8	99315.2	103989	78196	87631.1	74257	110999	87252	76732.2	91136.3	95225.8	89967.9	81805.1	91136.3	104573	91720.5	98731	105157	58168	111584	76391.5	86617.1	91136.3	84812.6	68749.6	92888.9	94057.4	118010	98146.8	100484	74286.2	73985.5	84812.6	73985.5	100484	80000.5	59405.6	60915.5	61961.3	71348.6	69414	83489.3	72361.4	78797.5
V	6318.03	6676.94	6478.24	5972.97	6392.29	5818.7	5847.91	5649.28	5858.69	6566.49	7685.6	5567.49	6745.01	6763.58	6233.49	6496.38	6087.44	6706.81	6233.49	6251.02	6706.7	6227.65	6309.44	9393.51	7197.43	7434.64	6664.71	6893.64	6995.54	8038.32	6332.81	6256.86	6741.75	7296.75	7372.69	7988.02	7897.8	7988.02	7771.48	6274.39	7194.03	9430.64	7277.19	7157.14	7201.07	7101.4	6664.71	6913.73	8120.36
Cr	135.024	150.742	148.993	143.941	140.408	263.653	216.098	214.521	224.723	315.472	324.07	562.592	602.101	541.457	241.394	272.416	793.353	741.659	787.511	232.514	283.749	404.622	388.206	571.16	588.297	608.726	599.102	740.19	910.683	970.292	339.366	330.194	349.94	350.524	291.461	297.205	279.461	339.611	321.205	432.898	532.936	821.778	931.245	962.495	422.832	445.777	334.198	336.363	547.974
Mn	3688.1	3180.68	4018.07	3897.77	3681.91	5363.02	5573.34	5783.65	4415.07	2167.41	1831.67	2477.04	2042.07	1806.92	2021.36	2173.25	2523.78	2339.87	2728.25	2576.35	2290.09	2634.77	2780.83	1194.3	2079.78	1858.66	2069.19	2336.83	2105.28	1726.48	2488.72	2512.09	2839.25	2441.99	2599.72	1816.55	1936.86	2267.68	1924.82	3382.56	1960.92	1491.33	2146.65	2236.99	2691.82	2609.94	3133.86	2741.67	2261.67
Co	68.8734	73.8238	72.602	76.2712	76.1753	94.6416	66.1907	71.9743	71.2185	120.931	87.3757	73.6101	72.8337	80.1976	99.7826	97.2121	154.348	157.956	148.739	123.034	131.038	182.623	171.29	101.361	100.016	152.001	159.339	176.781	177.144	157.177	187.823	207.394	117.25	118.068	150.141	103.399	137.384	145.685	167.279	173.276	99.0683	102.598	118.44	150.37	182.61	187.249	158.016	160.362	95.6397
Ni	32.2399	46.1012	44.0905	38.5627	42.3884	59.5891	33.2414	54.156	37.4679	56.7265	54.022	16.0715	22.5184	24.8823	57.8949	49.8913	95.5763	90.4066	69.6375	104.047	86.4627	106.267	119.587	77.4129	76.4143	103.159	127.7	142.547	122.948	104.826	159.664	175.554	72.4417	64.6717	90.3184	71.3388	96.9631	111.038	123.068	181.104	125.535	118.502	205.073	194.615	137.994	133.535	164.452	153.084	88.1209
Cu	1.02722	2.9084	1.33535	0.974443	2.9084	19.863	0.683522	10.3989	0.763915	5.0826	1.48514	2.47704	1.93068	2.6485	1.11584	4.61524	0.61926	0.354288	0.601733	0.730259	0.661907	0.312551	0.323067	0.544551	0.567849	2.16543	0.570229	0.33183	0.878201	0.457918	1.23268	3.62208	0.969784	0.917205	1.46052	0.956397	0.830081	0.643613	0.78196	0.730259	1.84061	1.93068	0.508661	0.643561	0.404082	0.475793	0.776547	0.79399	1.34738
Zn	1695.54	2277.21	553.387	10165.5	1361.38	13436.8	3715.56	8295.74	13594.1	11567.3	563.116	508.26	129.95	1039.6	3049.56	2588.04	2687.35	3663.18	5363.02	2138.2	3072.93	1272.4	1049.82	1881.18	1431.31	938.954	692.335	497.745	1332.34	1535.26	710.396	728.506	897.926	1331.99	1150.89	1636.1	1148.88	2327.84	2105.28	1362.96	1227.08	1544.55	2264.84	1598.38	3731.41	4631.61	3326.34	3055.66	2003.02
Ga	42.8215	44.7398	40.9025	43.3086	43.8116	42.4134	40.2519	41.654	42.7251	50.4755	44.8017	45.8018	49.9378	56.6828	47.2039	39.6677	50.9429	52.0304	44.6918	43.6987	47.905	47.8466	45.3929	73.5144	60.2902	50.8876	46.4364	41.245	52.5116	51.3302	42.6939	40.4856	41.5371	43.2313	44.8087	46.4966	56.241	37.5942	49.7447	48.4892	41.6243	44.3686	57.116	45.0245	48.8859	52.271	72.0005	59.6696	29.528
As	0.188118	0.1974	3.00754	0.29113	0.211014	1.86946	0.150141	0.195709	0.181655	0.230762	0.191212	0.0946416	0.127475	0.0977717	1.00717	0.946416	0.176431	0.193084	0.210315	0.167083	0.489566	0.130862	0.116257	0.207301	0.224336	0.433687	0.357296	0.0776996	0.0920307	0.115717	0.34994	0.452176	0.438155	0.399598	4.67366	0.117896	0.123309	0.126317	0.0763915	0.164746	0.293536	0.256805	0.785887	0.191831	0.35334	0.194287	0.472184	0.652034	0.25925
Y	0.00470294	0.00866332	0.00872186	0.00493236	0.0125618	0.00590049	0.00175262	0.00192788	0.00174437	0.0303788	0.012438	0.0303204	0.0483908	0.0365097	0.0024712	0.0108663	0.098731	0.0667674	0.0727922	0.0794522	0.019863	0.0396092	0.0613418	0.00532175	0.00234267	0.00824066	0.0228573	0.143131	0.00469176	0.00575492	0.0428224	0.0584207	0.0061926	0.0297946	0.0104573	0.00830081	0.00344062	0.00830081	0.00324814	0.010691	0.0133535	0.0154083	0.0253093	0.035829	0.0604576	0.0452935	0.128121	0.101053	0.00860156
Zr	0.308785	0.237004	0.613538	0.80602	0.329825	1.60657	0.683522	1.12168	1.56392	1.2502	0.470294	0.61926	0.364478	1.06435	2.37188	10.5157	7.06891	3.86168	3.93171	3.18393	6.30944	5.25786	7.41943	1.81311	3.03788	3.17596	4.06619	7.59469	4.89627	3.42201	7.18575	6.95207	4.1654	1.46636	3.2073	1.81655	2.49626	2.88724	2.5925	7.30259	3.36844	1.2995	3.74998	3.95047	1.86261	4.27071	3.77747	3.10378	1.23911
Nb	0.495047	0.427597	0.501657	0.393988	0.506804	0.525786	0.706891	0.630944	0.39098	0.279251	0.330444	0.255299	0.211632	0.201732	0.525786	0.353445	0.537471	0.381356	0.529876	0.695207	0.566681	0.420629	0.377982	0.158415	0.302035	0.421055	0.439101	0.525786	0.595493	0.423265	0.510597	0.590049	1.23852	1.05741	0.636786	0.637598	0.382559	0.679704	0.348875	0.44984	0.116091	0.163365	0.0561259	0.0474007	0.22339	0.211731	0.36692	0.250227	0.290528
Mo	0.214727	0.236385	0.523312	0.3591	0.315592	0.432313	0.277498	0.426471	0.439101	0.332998	0.426978	0.350524	0.246286	0.292078	0.189867	0.245367	0.196878	0.189475	0.175262	0.141378	0.186946	0.153646	0.179936	0.333538	0.251793	0.246618	0.188272	0.185194	0.18346	0.233291	0.15131	0.160657	0.196878	0.300867	0.317224	0.537748	0.294137	0.273686	0.206317	0.143131	0.23519	0.276607	0.0527225	0.222771	0.074257	0.110677	0.0842111	0.134738	0.173234
In	0.00575492	0.00884896	0.00739855	0.0078196	0.00544551	0.0156568	0.0116841	0.0109247	0.00625568	bdl	0.0029084	0.0706891	0.041027	0.144182	0.0172925	0.00484892	0.0911363	0.0812036	0.0674759	0.0689364	0.0506508	0.103405	0.0998994	0.00569304	0.012911	0.0266468	0.057865	0.0701049	0.0158197	0.00445542	0.0841258	0.0934731	0.00560839	0.00724417	0.00514102	0.00256242	0.00265265	0.00214738	0.00481206	0.0245367	0.00306769	0.00172029	0.00532175	0.00433166	0.0603338	0.0675493	0.0669478	0.0680305	bdl
Sn	0.217202	0.207301	0.23158	0.31098	0.1974	0.32073	0.244199	0.334167	0.403612	0.317809	0.0884896	0.362208	0.2698	0.556928	0.487229	0.380319	0.487229	0.558199	0.46795	0.349356	0.504171	0.406024	0.43465	0.199256	0.293272	0.4788	0.411431	0.418877	0.419251	0.335394	0.475545	0.432313	0.418877	0.372724	0.448671	0.266468	0.282709	0.268272	0.265265	0.562592	0.463161	0.206063	0.678833	0.492571	0.349627	0.443913	0.547372	0.596696	0.249024
Sb	bdl	0.0123762	0.0144963	0.0276694	0.0152227	0.0210315	0.0105157	0.0239525	0.0150377	0.0385577	0.00853956	0.00636786	bdl	0.011943	0.0122099	0.00829574	0.00712733	0.0080602	0.0109831	0.00963942	bdl	bdl	bdl	bdl	bdl	bdl	bdl	bdl	bdl	bdl	bdl	0.0106326	bdl	0.00683522	bdl	bdl	bdl	0.00703764	bdl	0.0157736	0.0135339	0.00841579	0.0188737	0.0104579	0.00736382	0.00643613	0.0123309	0.0135941	0.013173
Hf	0.167078	0.104579	0.0787975	0.254438	0.163984	0.348772	0.190452	0.277498	0.23158	0.304956	0.112623	0.262893	0.18193	0.20792	0.345851	0.64847	0.42764	0.380754	0.347019	0.302035	0.426471	0.358703	0.42355	0.149752	0.225504	0.232784	0.319401	0.461524	0.360905	0.177598	0.396677	0.411282	0.330077	0.196294	0.242446	0.15158	0.141956	0.208122	0.135941	0.473208	0.274288	0.10891	0.326112	0.262994	0.241335	0.427071	0.367521	0.318799	0.146768
Ta	0.0371285	0.0248761	0.028331	0.0408424	0.035829	0.0420629	0.042764	0.0525786	0.0368123	0.011801	0.010891	0.0227841	0.014542	0.0120049	0.0438155	0.0422382	0.0531629	0.037895	0.0389666	0.0724417	0.0406608	0.0519944	0.0487229	0.0234528	0.0304956	0.0225565	0.0316393	0.0385577	0.040301	0.0250617	0.0554997	0.064847	0.0800364	0.0695207	0.0357535	0.0278498	0.0276092	0.041504	0.0188873	0.0665996	0.0190076	0.00488859	0.0137994	0.0156559	0.0245048	0.0174437	0.0463161	0.019549	0.021955
W	0.058168	0.0488859	0.0727824	0.0234588	0.0488859	0.0280419	0.0496576	0.0262893	0.0209926	0.0368051	0.02599	0.0993152	0.0705442	0.0525987	0.00519944	bdl	0.00923047	bdl	0.00502418	0.0174094	0.0148389	0.00356366	0.0202136	0.0211632	0.0109831	0.0649628	0.00896247	0.0067768	0.0202107	0.0430691	0.00718575	0.0108663	0.0398429	0.0736101	0.12911	0.105865	0.0703764	0.0505267	0.0117896	0.0190452	0.0140753	0.0368191	0.00810639	bdl	0.00334157	bdl	0.00613538	0.037895	0.00451131
Pb	0.231434	0.354577	0.301355	0.428875	0.335394	0.514687	0.251793	0.344682	0.319401	0.695207	0.464106	0.646717	0.519799	2.47523	0.669501	0.376229	1.27941	0.740456	0.404271	0.140794	0.078868	0.487229	0.171173	1.88737	1.93373	0.104061	0.0265265	0.33884	0.29113	0.336632	0.0905521	0.461524	0.876311	0.33884	0.467366	0.391582	0.294739	0.155189	0.109474	1.88699	1.01053	11.4294	0.269182	0.0532175	0.318068	0.402409	1.42557	2.49024	0.553387
Fe3O4 (mol. %)	54.872	60.4642	51.2946	51.8191	55.8479	45.5876	46.0848	43.6901	54.3195	50.1057	60.3583	43.0765	55.4771	58.8714	49.8035	47.364	49.6251	55.0073	50.0602	44.3194	50.1716	46.6353	44.1904	63.8593	40.5011	56.4067	52.1797	49.7535	52.9738	60.4905	48.0373	48.1617	38.4354	46.5551	45.3201	57.3112	55.9327	53.0198	57.5619	45.8026	53.8255	62.4707	63.9054	63.6713	60.51	59.2882	52.7174	58.402	54.9391
Fe2TiO4	41.0899	35.5105	44.9015	41.3864	40.4185	45.7984	48.4396	49.4139	37.4302	42.5361	36.5298	53.8585	41.7991	37.8245	44.3292	45.5027	43.1486	39.1041	44.0029	49.4722	44.68	46.9134	49.628	28.6279	51.694	37.3518	41.1055	44.058	40.4053	32.9195	44.3084	45.1681	54.4658	47.6546	48.0677	36.949	36.2109	41.2436	35.9759	48.0143	38.3094	30.5617	29.4957	29.9696	34.0047	33.6541	39.245	35.0559	38.8584
FeAl2O4	0	0	0	0	0	0	0	0	0	0.362974	0	0	0	0	2.09133	3.43014	2.90835	1.26505	0.742712	2.06649	0.887208	2.22547	1.99895	3.74382	4.43883	2.64593	3.28413	2.09613	2.85548	2.76411	3.77764	2.56056	3.44141	1.96025	2.82316	1.94742	4.14091	1.35003	2.39631	2.01868	4.58813	2.89409	2.53047	2.52663	0.812077	1.95664	3.36078	2.02743	1.88105
ZnAl2O4	0.587221	0.804962	0.195262	3.38657	0.474563	4.58899	1.31016	2.86116	4.69925	4.01502	0.199555	0.177904	0.0452921	0.364391	1.07781	0.901451	0.942271	1.28142	1.8871	0.736485	1.08959	0.442106	0.361501	0.662036	0.483711	0.331436	0.239747	0.175719	0.462706	0.534649	0.247481	0.254726	0.301324	0.465304	0.398477	0.580676	0.401949	0.809745	0.744663	0.472762	0.426152	0.542327	0.798272	0.563895	1.29941	1.63819	1.14201	1.08146	0.701273
MgAl2O4	0	0	0	0	0	0	0	0	0	0.48019	0	0	0	0.494082	0.313927	0.278717	0.668079	0.596789	0.491216	0.812234	0.520073	1.09792	1.08268	0.277189	0.282643	0.555926	0.605354	1.06503	0.550889	0.447679	0.956224	1.17358	0.524917	0.483272	0.509471	0.409027	0.56743	0.662143	0.551347	0.642908	0.224854	0.266033	0.373749	0.344548	0.426209	0.519836	0.584614	0.496104	0.623366
FeV2O4b	1.40442	1.51485	1.46712	1.32628	1.43018	1.28309	1.32349	1.25055	1.29987	1.46288	1.74809	1.25077	1.50886	1.52159	1.41402	1.45232	1.36995	1.5058	1.40778	1.38193	1.52629	1.38882	1.39446	2.12178	1.56117	1.68436	1.48128	1.562	1.5593	1.79668	1.41598	1.40416	1.45206	1.636	1.63838	1.81963	1.77346	1.78342	1.7643	1.39686	1.60356	2.1253	1.64625	1.6206	1.60949	1.61211	1.46861	1.5705	1.82472
Mag-Uspc	57-43	63-37	57-43	56-44	58-42	50-50	49-51	47-53	59-41	54-46	62-38	44-56	57-43	61-39	53-47	51-49	53-47	58-42	53-47	47-53	53-47	50-50	47-53	69-31	44-56	60-40	56-44	53-47	57-43	65-35	52-48	52-48	41-59	49-51	49-51	61-39	61-39	56-44	62-38	49-51	58-42	67-33	68-32	68-32	64-36	64-36	57-43	62-38	59-41
a Stratigraphic position as in Figure 2; b FeV2O4 = coulsonite component; c magnetite (Mag) and ulvöspinel (Usp) proportions normalized to 100% both components; d DL = average detection limit.
bdl = below detection limit; Tmt = titanomagnetite.
[truncated: 125 more columns]

## Sheet: Table S3b
Table S3b: Trace element compositions of ilmenite determined by LA-ICP-MS
Sample	LDC-04	LDC-07.1	LDC-07.1	LDC-07.1	LDC-10	LDC-10	LDC-10	LDC-10	LDC-12.1	LDC-12.1	LDC-12.1	LDC-15	LDC-38.1	LDC-38.1	LDC-41	LDC-43	LDC-43	LDC-47.1	LDC-47.2	LDC-48	LDC-49	LDC-49	LDC-50	LDC-50	LDC-51	LDC-52.1	LDC-52.1	LDC-52.2	LDC-53	LDC-54.1	LDC-54.2	LDC-56.1	LDC-56.2	LDC-58	LDC-58	LDC-59	LDC-61.1	LDC-61.1	LDC-61.2	LDC-62	LDC-64	LDC-68	LDC-88.2	LDC-88.2	LDC-93.1	LDC-93.2	Avg. A (n=46)	LDC-04	LDC-04
Position (m)a	118.3	115.6	115.6	115.6	112.6	112.6	112.6	112.6	110.7	110.7	110.7	96.2	73.5	73.5	67.2	67.2	67.2	60.6	60.3	59.1	57.9	57.9	57.1	57.1	55.9	54.8	54.8	54.6	53.9	53.3	52.6	51.3	50.7	49.4	49.4	48.3	46.8	46.8	46.3	45.1	43	39.4	14.6	14.6	1.5	1.1	-	118.3	118.3
Type	A - Ilmenite-E1 (lamellar exsolution)																																															B - Primary ilmeniteb
Grain #	1	2	3	4	5	6	7	8	9	10	11	12	13	14	15	16	17	18	19	20	21	22	23	24	25	26	27	28	29	30	31	32	33	34	35	36	37	38	39	40	41	42	43	44	45	46	-	47	48
Mg (ppm)	557.632	540.027	530.685	526.014	594.64	460.981	513.798	547.931	724.347	593.203	704.226	451.998	470.323	338.46	663.266	288.877	332.963	1724.64	445.89	375.827	806.267	826.747	722.91	791.177	1786.44	427.925	457.388	956.454	494.036	1227.37	874.894	1032.99	432.956	607.934	579.55	474.275	289.595	290.314	494.396	473.197	219.891	277.02	469.604	409.242	273.427	349.778	596.337	610.809	621.228
Al	60.3263	75.4528	60.7216	42.9363	68.4824	45.8825	50.9486	53.4278	78.7225	60.3982	77.2493	63.596	203.004	54.2182	63.2367	34.2771	56.5178	80.483	52.817	143.36	73.297	98.0887	48.3617	68.9854	67.5123	54.7931	155.577	697.04	233.544	33.307	865.911	352.113	43.2956	50.1941	62.5181	67.5482	29.211	70.4226	83.3574	64.6739	61.4402	130.426	43.4752	38.8043	26.6959	27.8457	108.141	50.6612	35.5347
Si	255.821	122.162	50.3019	190.429	280.253	287.439	75.4528	280.253	136.534	bdl	61.0809	294.625	344.927	132.941	50.3019	123.958	bdl	89.8248	bdl	200.13	255.102	124.677	200.848	56.41	161.685	140.127	244.323	250.791	431.878	bdl	398.822	323.369	44.1938	359.299	104.197	102.4	176.057	227.077	bdl	105.275	bdl	154.499	bdl	107.79	125.395	109.227	184.099	320.854	257.977
P	9.8448	6.75482	14.0127	32.3369	21.1987	13.2941	24.7916	bdl	bdl	3.59299	1.7965	2.1558	25.1509	3.23369	12.2162	8.98248	23.3544	bdl	15.5936	15.6295	18.6836	22.025	16.0247	10.276	9.91666	11.8569	14.8031	17.426	18.7554	6.9704	17.6057	20.8034	12.0365	13.6534	12.9348	8.19202	8.62318	5.60507	5.03019	6.0003	5.03019	7.90458	9.37771	10.0604	9.66515	10.2041	12.6373	15.5577	12.8629
Ca	bdl	75.4528	bdl	21.558	bdl	35.9299	bdl	bdl	35.9299	bdl	bdl	bdl	bdl	bdl	bdl	bdl	bdl	75.4528	bdl	bdl	bdl	17.965	bdl	bdl	bdl	bdl	bdl	bdl	bdl	bdl	25.8695	15.8092	bdl	bdl	bdl	bdl	24.4323	183.243	bdl	28.3846	100.604	32.3369	bdl	bdl	bdl	bdl	51.7667	13.2941	bdl
Sc	16.0319	21.2346	23.4622	21.8813	10.1682	3.45287	3.09716	3.90558	78.0398	80.6627	82.6388	9.05434	49.8707	61.548	82.8544	6.2554	4.58466	90.3997	9.21243	8.07705	31.9058	31.7261	18.1841	22.8874	78.8662	12.5827	12.7156	74.5905	15.6439	91.1183	54.1464	64.8751	8.69145	9.97415	18.432	4.83257	1.73182	1.71745	7.86147	1.69949	17.5338	1.69589	65.8595	50.0504	3.10075	0.458106	29.7677	18.5614	13.9013
Ti	312950	306842	346724	339178	331992	327681	328040	349957	325166	328759	340256	316902	293044	336663	295919	292721	299584	322291	290565	293440	297536	288374	297176	287799	322327	291859	291212	305620	298254	328579	315824	296961	303823	318698	308279	308099	311872	313560	307919	315968	297140	293907	298685	290457	299620	298111	310138	317872	319237
V	989.151	1225.57	1310.36	1445.1	1588.46	1194.31	1117.42	1414.2	1026.52	1102.69	1243.18	1777.81	1989.08	1976.15	1343.42	1684.75	1357.07	1373.96	1700.56	1724.28	1605.35	1389.41	1571.22	1350.96	971.186	1735.06	2080.34	1050.59	1330.13	1395.52	1253.95	1138.26	989.869	1247.49	1218.02	1107.72	1449.05	1581.64	1339.11	1044.48	1379.71	2159.39	1802.24	1908.6	1578.04	1641.28	1432.67	729.377	491.881
Cr	19.0572	26.4085	34.0256	36.1814	72.7581	41.3553	39.7026	54.1464	60.2185	76.7104	115.335	174.26	64.063	51.8109	66.3985	160.212	71.4287	41.032	49.1162	53.5715	39.5948	38.0857	77.0697	59.8233	105.311	116.054	148.75	79.8722	107.574	167.757	93.0226	48.9006	40.5289	23.6455	21.3424	41.8224	68.3387	61.4402	37.8701	55.7632	135.815	122.162	53.7871	87.9564	177.494	159.637	75.5915	21.0945	10.4376
Mn	12769.5	15949.3	17641.6	17339.8	7545.28	7811.16	7724.93	8163.28	6999.15	6801.53	7185.98	13779.1	5971.55	6948.85	7944.11	7689	7649.48	7071.01	5938.14	6097.31	6920.1	6632.66	7166.94	6726.08	8069.86	5411.05	5213.43	6607.51	5829.27	7897.4	6884.17	7350.54	7114.12	7714.15	7401.56	7081.79	7746.49	8095.01	7620.74	9657.96	6920.1	7714.15	8503.53	8562.1	6350.61	6255.4	8097.1	13351.6	13401.9
Co	77.1775	82.8903	69.8478	71.8598	87.669	90.5434	92.1602	80.986	80.9501	69.5603	68.2668	65.9673	93.31	68.6621	126.114	106.64	96.6874	118.569	75.7906	61.9791	124.138	126.833	111.455	104.197	126.473	84.4712	84.4712	110.556	101.071	116.449	103.586	131.863	72.5066	90.5434	74.7342	88.6032	75.6325	74.0516	99.5977	109.119	74.6624	90.1841	140.199	139.336	113.97	90.723	94.4577	88.2798	72.0539
Ni	6.02185	6.73686	6.0003	5.46135	7.86865	7.76086	7.11412	6.61111	2.27796	2.47916	3.41334	6.03623	10.276	5.85658	13.1863	10.5562	8.14531	12.7192	9.33459	7.95848	15.5936	15.6295	12.2449	12.1443	20.9831	11.7132	13.3695	14.875	19.0069	18.1446	17.929	26.9474	8.44353	13.7612	11.2101	11.7024	16.9589	15.4499	15.8451	13.3659	11.6772	15.5217	36.0377	35.7143	39.7744	74.6624	14.4461	6.23743	6.19791
Cu	0.624103	0.643146	0.707819	0.894655	1.13179	1.27192	1.44079	1.62763	1.52343	1.36174	1.65996	0.7689	1.10664	0.661111	0.556914	0.808423	0.750935	0.919806	1.24318	1.05275	0.826388	0.808423	1.09227	0.998852	0.991666	0.808423	0.865911	1.06712	1.58092	0.499426	1.04556	1.29348	1.12101	0.5641	0.754528	1.21084	1.09227	1.0743	1.36174	1.32581	0.905434	0.675482	0.837167	0.790458	0.91262	0.711412	0.999375	0.658955	0.647816
Zn	146.235	320.136	334.508	202.285	106.353	76.1714	102.76	88.7469	85.1539	85.1539	115.694	478.227	100.244	39.0918	40.6008	99.7415	71.9676	15.0187	161.469	168.871	48.5054	67.9075	71.4646	68.698	18.3961	40.1337	39.1995	10.1322	33.7741	18.8991	12.827	12.5755	29.3547	32.6962	19.2584	46.7448	39.5229	49.7629	63.3444	49.4755	35.2473	194.74	133.192	120.545	155.361	224.921	97.2849	170.811	182.883
Ga	0.431878	1.29348	0.578472	0.434752	0.441938	0.388043	0.388043	0.359299	0.855132	0.607216	0.812016	2.13064	0.700633	0.467089	0.495833	0.399181	0.390558	0.449124	0.524936	0.459184	0.538949	0.58961	0.497629	0.574879	0.424692	0.531763	0.711412	0.455591	0.510205	0.291751	0.567693	0.409242	0.318339	0.355706	0.197615	0.509486	0.129348	0.169589	0.378342	0.344927	0.308997	0.31259	0.465652	0.477868	0.305404	0.245042	0.504995	0.367563	0.313668
As	0.160966	0.729377	bdl	0.204801	bdl	bdl	0.186836	bdl	0.10779	0.208394	0.158092	0.474275	0.916213	0.172464	0.222765	0.244323	0.125755	0.204801	0.679075	0.729377	0.470682	0.625181	0.467089	0.409601	0.0970108	0.183243	0.147313	0.406008	0.416787	bdl	0.204801	0.485054	0.319776	0.111383	0.194022	0.15378	bdl	0.155217	0.237137	0.125755	0.14372	0.0970108	0.17965	0.140127	0.125755	0.147313	0.289218	0.147313	0.147672
Y	0.0094855	0.0100604	0.0111383	0.00467089	0.00359299	0.00970108	0.00287439	0.00323369	0.0653925	0.0373671	0.0265881	0.0118569	0.0024073	0.00646739	0.0740156	0.00438345	0.00520984	0.0161685	0.00334148	0.0014372	0.00617995	0.00477868	0.00244323	0.00136534	0.0113898	0.00258695	0.00219173	0.0208394	0.00510205	0.0344927	0.0104197	0.00955736	0.00308997	0.00553321	0.00538949	0.00603623	0.00129348	0.0233544	0.000826388	0.00416787	bdl	0.000970108	0.00301811	0.00503019	0.00154499	0.00165278	0.0107255	0.00801237	0.0115694
Zr	2.95344	0.937771	0.589251	0.524577	1.22521	0.664703	0.427566	1.01682	0.776086	0.891062	0.991666	0.14372	0.582065	0.362892	1.5881	0.36936	0.458825	5.2817	0.466011	0.390199	2.40371	1.65637	0.84076	2.17735	28.0253	1.95099	1.31144	7.08897	7.54888	12.288	4.23614	4.27566	1.64559	4.37267	4.26488	8.22795	1.22521	4.308	4.64933	23.7497	0.743749	0.24073	0.158092	0.127192	0.115694	0.155936	3.22673	0.980887	2.5618
Nb	11.4006	7.3836	10.3119	6.94885	1.60607	6.28774	7.78601	6.85902	3.46364	4.9224	3.56065	2.20969	2.50072	3.80498	4.0493	0.831418	3.96666	2.68396	5.78472	0.547931	2.45761	2.94625	2.27077	3.02889	11.2353	1.50187	1.25755	4.19302	3.07201	4.52717	2.64444	1.78248	6.9704	2.83487	2.13424	8.19561	2.18095	2.34479	1.37612	6.44942	5.41823	1.04915	2.54025	1.72464	0.668296	2.9714	4.0149	15.9493	25.7546
Mo	0.0445531	0.0319776	0.0395229	0.0280253	0.034852	0.0168871	0.0114976	0.0208394	0.0326962	0.0574879	0.0898248	bdl	0.0305404	0.0132941	0.0718598	0.0161685	0.0269474	bdl	0.0754528	0.0847946	0.0503019	0.0280253	0.0485054	0.0395229	0.0132941	0.0750935	0.087669	0.0391636	0.042038	0.0398822	0.0574879	0.0319776	0.0499426	0.0585658	0.100604	0.101322	0.183243	0.170667	0.0682668	0.0255102	0.0341334	0.00826388	0.021558	0.0431159	0.00970108	0.0255102	0.0495588	0.0305404	0.0689854
In	0.018468	0.0208394	0.0255102	0.0154499	0.00646739	bdl	bdl	bdl	0.149109	0.142282	0.129348	0.0229951	0.0366485	0.0359299	0.196896	0.00283846	0.0049224	0.194022	0.017965	0.0106712	0.0822795	0.1024	0.0305404	0.0301811	0.235341	0.0258695	0.0222765	0.157014	0.0183243	0.172104	0.052817	0.176775	0.00582065	0.00862318	0.0125755	0.00388043	0.00503019	0.00380857	0.00323369	bdl	bdl	0.00503019	0.0237137	0.0341334	0.00273067	bdl	0.0561216	0.0116413	0.0087669
Sn	0.318698	0.398822	0.17965	0.485054	0.247916	0.0862318	0.150906	0.176057	0.700633	0.571286	0.258695	0.197615	0.463496	0.226358	1.07071	0.143001	0.268756	0.747342	0.261211	0.143001	0.632367	0.52817	0.249354	0.284565	0.315824	0.204801	0.203363	0.406367	0.335945	0.535356	0.542542	0.711412	1.00604	0.503019	0.449124	0.246839	0.222765	0.268037	0.373671	0.226358	0.255102	0.258695	0.262648	0.326962	0.132581	0.210549	0.364954	0.190069	0.105993
Sb	0.00704226	0.00970108	bdl	bdl	bdl	0.0467089	0.0219173	bdl	0.00646739	0.010779	0.0287439	0.0391636	0.0104197	bdl	0.00826388	0.0129348	0.00898248	0.010779	bdl	bdl	bdl	bdl	0.00646739	bdl	bdl	bdl	bdl	bdl	0.00610809	bdl	0.0132941	0.0114976	bdl	bdl	bdl	bdl	0.0118569	bdl	bdl	bdl	bdl	bdl	0.00718598	0.00646739	bdl	bdl	0.014239	0.00639553	0.00679075
Hf	0.912979	0.797644	0.625181	0.510205	0.452717	0.31259	0.359299	0.441938	0.344927	0.344927	0.42038	0.0194022	0.298218	0.0970108	0.646739	0.142282	0.366844	1.09227	0.348161	0.0653925	0.603623	0.524577	0.269474	0.45631	1.68511	0.352113	0.30756	0.966515	0.711412	1.28629	0.617995	0.758121	0.720036	0.542542	0.560507	0.739797	0.467089	0.592125	0.592844	1.62763	0.754528	0.0772493	0.160966	0.0898248	0.031259	0.260492	0.529459	0.783272	0.944238
Ta	0.843634	0.591406	0.776086	0.650332	0.080483	0.549728	0.776086	0.535356	0.293547	0.385169	0.114976	0.12827	0.186117	0.190429	0.397026	0.0686261	0.387684	0.203363	0.47679	0.0653925	0.154858	0.182524	0.209831	0.257977	0.672608	0.135456	0.120365	0.386606	0.162763	0.267678	0.162403	0.19474	0.431878	0.160966	0.110664	0.684465	0.211627	0.138689	0.114257	0.531044	0.48182	0.0944957	0.135456	0.133659	0.0790458	0.197974	0.306834	1.04664	1.75661
W	0.0219173	0.0391636	0.0718598	0.0970108	0.0287439	0.0445531	0.0265881	0.0646739	0.481461	0.316183	0.391636	0.176057	0.0194022	0.0219173	0.0650332	0.0661111	0.07689	0.0520984	0.140845	0.296063	0.165278	0.113179	0.132941	0.173901	bdl	0.1642	0.174619	0.00790458	0.31798	0.107071	0.190429	0.00610809	0.0847946	0.255102	0.305404	0.721113	0.416787	0.265881	0.233544	0.0208394	0.0934178	0.0441938	0.014372	0.0380857	0.0208394	0.00506612	0.146028	0.00517391	0.0262648
Pb	0.00880283	4.67089	0.34852	0.305404	0.17965	0.132941	0.258695	0.258695	0.650332	0.262288	0.269474	0.520984	0.0704226	0.45631	0.395229	1.94022	0.560507	0.283846	0.0413194	0.222765	0.0211987	0.0549728	1.28629	1.00604	0.176057	5.56914	6.17995	0.0438345	0.0269474	0.182524	1.01322	0.111383	0.0308997	0.27666	0.280253	0.0977294	0.0373671	0.0715005	0.010779	1.83243	9.66515	0.0826388	0.0650332	0.100604	0.00862318	bdl	0.890411	bdl	0.0258695
a Stratigraphic position as in Figure 2; b Ilmenite derived from primary crystallization; c DL = average detection limit.
bdl = below detection limit.
[truncated: 131 more columns]

## Sheet: Table S4
Table S4: Composition of reference materials used for calibration and monitoring of the LA-ICP-MS data
	Working values				Analyzed values
Standard	GSE-1Ga		BC-28b		GSE-1G (n=42)		BC-28 (n=41)		DLc
	Value	+/-	Value	+/-	Value	+/-	Value	+/-
Mg	21106	181	11618	1627	21109.6	107.5	13424.2	195.707	0.0659003
Al	68804	2117	20787	1455	68816.7	340.952	17334.5	266.544	0.048586
Si	250994	7011	220	-	251119	1465.95	321.439	59.3659	35.5129
P	70	20	-	-	69.9571	5.6619	bdl	5.30732	1.39145
Ca	52858	2143	-	-	52873.6	315.714	28.0463	12.739	12.8654
Sc	530	20	31	-	529.967	2.26667	34.8971	0.333659	0.00597321
Ti	450	42	87615	2628	450.026	3.67143	100465	700	0.216994
V	440	20	9603	299	439.969	2.0881	8807.73	72.5366	0.0103134
Cr	400	80	1172	35	400.04	1.97143	1316.94	12.4293	0.0847626
Mn	590	20	2125	106	590.117	2.33333	2121.37	24.4561	0.112867
Co	380	20	241	25.3	380.026	1.80476	293.22	4.95366	0.00413139
Ni	440	30	573	85	440.44	3.25238	577.851	6.74146	0.023855
Cu	380	40	33	-	380.1	3.2119	16.6572	3.38332	0.00788613
Zn	460	10	588	-	460.048	4.61667	360.849	8.71951	0.117935
Ga	490	70	41.088	5	490.121	3.12619	41.5992	0.61478	0.00654932
As	260	90	-	-	259.562	2.74524	0.458854	0.0759756	0.0622251
Y	410	30	0.08025	-	409.962	1.92619	0.0161732	0.00376488	0.000578037
Zr	410	30	39.162	5	410.024	2.48333	24.1915	0.539512	0.00148893
Nb	420	40	1.7227	0.2	420.319	2.50714	5.94346	0.0892195	0.000481765
Mo	390	30	0.7597	0.04	390.15	3.22143	0.452341	0.0434634	0.00208876
In	370	60	0.11235	0.02	370.062	3.22857	0.122778	0.0101073	0.00158525
Sn	280	50	2.19885	-	280.224	2.73333	2.09988	0.460463	0.0195768
Sb	450	110	-	-	450.231	4.82619	0.117902	0.038378	0.00614408
Hf	395	7	0.583	-	394.983	2.55238	1.20022	0.0537073	0.00185408
Ta	390	40	0.07	-	389.876	2.39286	0.440449	0.0122341	0.000353395
W	430	50	0.50825	-	430.195	3.49048	0.770729	0.35752	0.00269224
Pb	378	12	1.98485	-	377.998	4.11429	0.913878	0.356244	0.00825823
a Synthetic basalt glass from the U.S. Geological Survey - values are from the GeoReM database (http://georem.mpch-mainz.gwdg.de/sample_query_pref.asp, viewed on May 24, 2018); b in-house monitor, a natural massive magnetite from Magnet Heights, Bushveld Complex - values are from a compilaiton made at the LabMaTer, Université du Québec à Chicoutimi ; c DL = average detection limit determined from…
+/- = uncertainty; bdl = below detection limit.

## Sheet: Table S5a
Table S5a: Modal composition of magnetite-ilmenite assemblages measured from processed backscattered images
Sample	LDC-04	LDC-06	LDC-07.1	LDC-08	LDC-10	LDC-12.1	LDC-13.1	LDC-13.2	LDC-13.3	LDC-15	LDC-18.2	LDC-19.1	LDC-19.2	LDC-20	LDC-25	LDC-26.1	LDC-26.2	LDC-27	LDC-28	LDC-29	LDC-30	LDC-31	LDC-32	LDC-33	LDC-35.1	LDC-35.2	LDC-36	LDC-38.1	LDC-38.2	LDC-40.1	LDC-40.2	LDC-41	LDC-43	LDC-44	LDC-47.1	LDC-47.2	LDC-48	LDC-49	LDC-50	LDC-51	LDC-52.1	LDC-52.2	LDC-53	LDC-54.1	LDC-54.2	LDC-56.1	LDC-56.2	LDC-58	LDC-59
Position (m)a	118.3	116.8	115.6	114.7	112.6	110.7	97.8	97.5	97.3	96.2	92.9	92.1	91.8	91.5	87.8	87.1	86.3	85.7	85.2	83.8	82.9	82.4	80.9	80.1	79.2	78.5	76.4	73.5	72.9	68.6	68.3	67.2	65.6	64.2	60.6	60.3	59.1	57.9	57.1	55.9	54.8	54.6	53.9	53.3	52.6	51.3	50.7	49.4	48.3
Exsolution type of Ilmb	E1	DR	E1	E1	E1	E1	E2	E2	E1	E1	E2	E2	E2	E2	E2	E2	E2	E2	E2	E2	E2	E2	E2	E2	E2	E2	E2	E1	E2	E2	E2	E1	E1	DR	E1	E1	E1	E1	E1	E1	E1	E1	E1	E1	E1	E1	E1	E1	E1
Measurements on whole-rock
A - Internal Ilm (vol. %)c	12.0948	1.5028	14.448	3.81473	7.59145	10.539	14.197	4.53571	3.51827	6.8242	4.38532	8.44716	16.9228	8.71074	13.3145	6.00609	18.5187	22.0728	20.4725	27.929	25.3414	16.5262	6.75617	4.68866	11.3382	15.7094	10.9558	10.9167	9.87532	9.36352	16.9012	20.1143	4.43541	2.2769	20.1192	4.60366	2.15586	10.3396	6.03981	15.8465	5.96348	15.8594	7.9678	13.4467	13.2214	16.1021	9.01255	10.0013	8.63254
B - External Ilmd	12.9802	31.4315	11.6342	11.9027	13.1297	18.2846	6.09995	7.10318	8.90787	14.5193	6.82956	10.1581	11.7625	17.0742	11.5439	6.16998	10.7335	5.42647	7.1132	6.4791	4.53436	5.89913	7.98382	11.3941	9.94149	9.86319	9.16555	7.35234	3.84161	9.15827	10.6426	9.22878	12.6911	22.8959	9.83728	8.45324	13.0523	10.0128	10.5688	9.22734	12.0088	7.75618	8.9903	9.98437	12.0903	6.50516	6.13475	9.59677	9.702
C - Magnetite	24.6214	35.4147	25.8137	10.5316	20.5888	36.7529	31.8021	10.8736	13.3627	17.5052	10.3159	24.7637	44.7655	36.126	36.9647	20.3312	46.4976	46.7031	50.9276	54.5228	52.207	32.3537	15.135	15.035	23.7775	42.7891	25.6887	22.0372	20.907	27.4202	39.8509	43.5902	16.7176	31.2725	46.135	12.1532	11.5997	26.6627	20.1688	47.4227	16.0447	42.9225	24.2468	39.7851	37.1332	47.6528	22.6777	29.4016	25.7107
D - Tmt (A+C)	36.7162	36.9175	40.2617	14.3463	28.1802	47.2919	45.999	15.4093	16.8809	24.3294	14.7012	33.2109	61.6883	44.8367	50.2792	26.3373	65.0163	68.7758	71.4	82.4518	77.5484	48.8799	21.8912	19.7237	35.1157	58.4985	36.6445	32.9539	30.7823	36.7837	56.7521	63.7045	21.153	33.5494	66.2542	16.7569	13.7556	37.0023	26.2087	63.2692	22.0082	58.7819	32.2146	53.2318	50.3546	63.7549	31.6902	39.4029	34.3432
Ilm (A+B)	25.075	32.9343	26.0822	15.7174	20.7211	28.8236	20.2969	11.6389	12.4261	21.3435	11.2149	18.6053	28.6853	25.7849	24.8584	12.1761	29.2522	27.4992	27.5856	34.4081	29.8758	22.4253	14.74	16.0828	21.2797	25.5726	20.1214	18.269	13.7169	18.5218	27.5438	29.3431	17.1265	25.1728	29.9565	13.0569	15.2082	20.3524	16.6087	25.0738	17.9723	23.6156	16.9581	23.4311	25.3117	22.6073	15.1473	19.5981	18.3345
FTO (A+B+C)	49.6964	68.349	51.8959	26.249	41.3099	65.5765	52.099	22.5125	25.7888	38.8487	21.5308	43.369	73.4508	61.9109	61.8231	32.5073	75.7498	74.2023	78.5132	88.9309	82.0828	54.779	29.875	31.1178	45.0572	68.3617	45.8101	40.3062	34.6239	45.942	67.3947	72.9333	33.8441	56.4453	76.0915	25.2101	26.8079	47.0151	36.7775	72.4965	34.017	66.5381	41.2049	63.2162	62.4449	70.2601	37.825	48.9997	44.0452
Tmt/Ilm (D/B)	2.82864	1.17454	3.46065	1.2053	2.14631	2.58643	7.54089	2.16935	1.89506	1.67566	2.15259	3.2694	5.24448	2.62599	4.35549	4.26862	6.05733	12.6741	10.0377	12.7258	17.1024	8.28595	2.74195	1.73104	3.53224	5.93099	3.99807	4.48209	8.01286	4.01645	5.33253	6.90281	1.66676	1.4653	6.73501	1.9823	1.05388	3.69549	2.4798	6.8567	1.83267	7.57872	3.58326	5.33152	4.16488	9.80067	5.16569	4.10585	3.53981
Measurements on titanomagnetite
Ilm/Mag	0.491233	0.0424343	0.559705	0.362218	0.368717	0.286753	0.446416	0.417131	0.263291	0.389839	0.425102	0.34111	0.378031	0.241121	0.360196	0.295412	0.398271	0.47262	0.401992	0.512244	0.485403	0.510798	0.446393	0.311849	0.476843	0.367134	0.426483	0.495374	0.472346	0.341482	0.42411	0.461441	0.265313	0.0728085	0.436095	0.378803	0.185854	0.387792	0.299462	0.334153	0.371678	0.36949	0.328612	0.337984	0.356054	0.337905	0.397419	0.340163	0.335757
Ilm (vol. %)e	32.0849	3.96485	34.9523	25.899	26.2385	21.7056	30.0611	28.6699	20.2998	27.3199	29.054	24.7736	26.7194	18.9226	25.7927	22.2116	27.7425	31.2594	27.9274	32.9924	31.8286	32.9307	30.0601	23.1536	31.4485	26.1561	29.1202	32.2658	31.2471	24.7938	29.0064	30.7535	20.423	6.61027	29.5772	26.759	15.2651	27.2166	22.4459	24.3949	26.3921	26.2786	24.0904	24.6039	25.5739	24.5996	27.7001	24.7223	24.4826
Ilm (wt. %)f	30.5385	3.69142	33.3435	24.5303	24.8586	20.4908	28.5664	27.2144	19.1425	25.9053	27.5874	23.4436	25.3239	17.8245	24.4276	20.9768	26.3148	29.7333	26.494	31.4249	30.2884	31.3646	28.5654	21.8827	29.9177	24.7789	27.6516	30.7151	29.7213	23.4631	27.5411	29.2404	19.2605	6.16706	28.0958	25.3622	14.3381	25.8052	21.202	23.0784	25.0072	24.8974	22.7849	23.28	24.2163	23.2758	26.2736	23.3941	23.1629
a Stratigraphic position as in Figure 2; b DR = dynamically recrystallized titanomagnetite, O = other; c whole-rock content of ilmenite as exsolutions in titanomagnetite; d whole-rock content of ilmenite as grains excluded from titanomagnetite; e calculated assuming an average spinel content in titanomagnetite of 2.6 vol. % (see text for details); f calculated assuming the following specific dens…
FTO, iron-titanium oxides; Ilm, ilmenite; Mag, magnetite; Tmt, titanomagnetite.
See text for details about the quantitative method.
[truncated: 30 more columns]

## Sheet: Table S5b
Table S5b: Modal proportion of corundum and magnetite in the HCMs measured from processed backscattered images
Sample	LDC-51	LDC-52.1	LDC-54.1	LDC-54.1	LDC-54.1	LDC-54.2	LDC-56.1	LDC-58	LDC-62	LDC-64	LDC-65	LDC-72.1	Avg. (n=12)
Position (m)a	55.9	54.8	53.3	53.3	53.3	52.6	51.3	49.4	45.1	43	42.3	35.7	-
Analysis #	1	2	3	4	5	6	7	8	9	10	11	12	-
Cor (vol.%)	46.21	56.28	61.32	59.35	48.66	48.37	42.95	58.74	62.73	71.58	64.04	76.82	58.0875
Mag	24.75	26.65	29.48	29.28	28.68	28.3	20.49	33.11	30.05	28.41	27.38	19.03	27.1342
Cor/Mag	1.86707	2.11182	2.08005	2.02698	1.69665	1.70919	2.09614	1.77409	2.08752	2.51954	2.33893	4.03678	2.1954
Cor/Mag (wt. %)b	1.45416	1.64478	1.62004	1.57871	1.32143	1.33119	1.63257	1.38174	1.62586	1.96233	1.82167	3.14403	1.70988
a Stratigraphic position as in Figure 2; b calculated assuming the following specific density: magnetite = 5.2, corundum = 4.05.

## Sheet: Table S6
Table S6: Temperature and oxygen fugacity conditions of equilibrium between magnetite and ilmenite
Sample	LDC-04	LDC-04	LDC-04	LDC-04	LDC-04	LDC-04	LDC-07.1	LDC-07.1	LDC-07.1	LDC-07.1	LDC-10	LDC-10	LDC-10	LDC-10	LDC-47.1	LDC-47.1	LDC-47.1	LDC-51	LDC-51	LDC-51	LDC-54.1	LDC-54.1	LDC-54.2	LDC-54.2	LDC-54.2	LDC-58	LDC-58	LDC-72.1	LDC-72.1	LDC-72.1	LDC-20	LDC-26.2	LDC-26.2	LDC-29	LDC-29	LDC-29	LDC-30	LDC-30	LDC-30	LDC-35.1	LDC-38.2	LDC-38.2	LDC-40.2	LDC-40.2	HN-06	HN-11	HN-13	HN-14	HN-18
Position (m)a	118.3	118.3	118.3	118.3	118.3	118.3	115.6	115.6	115.6	115.6	112.6	112.6	112.6	112.6	60.6	60.6	60.6	55.9	55.9	55.9	53.3	53.3	52.6	52.6	52.6	49.4	49.4	35.7	35.7	35.7	91.5	86.3	86.3	83.8	83.8	83.8	82.9	82.9	82.9	79.2	72.9	72.9	68.3	68.3	-	-	-	-	-
FTO occur.	Titanomagnetite hosting Ilmenite-E1 - Lac Doré Complex																														Titanomagnetite hosting Ilmenite-E2 - Lac Doré Complex														Nelsonitic gabbros and microgabbros from the Sept-Îles Intrusive Suitee
Mag grain #b	1	2	3	4	5	6	7	8	9	10	11	12	13	14	41	42	43	44	45	46	47	48	49	50	51	52	53	54	55	56	15	20	21	23	24	25	26	27	28	30	32	33	38	40	-	-	-	-	-
Ilm grain #b	57	58	59	59	59	60	61	61	61	62	63	64	65	66	68	69	70	71	72	73	74	75	76	77	78	79	80	81	82	83	84	87	89	90	91	92	93	94	95	97	99	101	104	106	-	-	-	-	-
T (°C)c	500.484	434.171	425.8	395.528	362.21	447.659	501.013	455.804	442.675	419.621	395.407	490.975	491.677	465.92	394.699	464.992	476.614	485.962	442.934	491.547	443.985	500.248	443.909	423.173	338.884	468.067	480.838	479.653	509.812	506.106	374.882	530.994	424.511	476.334	507.213	496.642	517.779	488.103	509.148	458.967	494.416	451.49	437.621	511.596	469.768	536.964	608.392	560.5	592.392
Log10 fO2c	-25.573	-30.6271	-33.2459	-34.1499	-35.2397	-29.1748	-24.986	-26.0406	-26.4015	-32.9641	-34.6043	-25.5843	-26.0272	-26.5908	-29.3662	-27.8077	-28.2778	-26.1438	-28.9422	-24.8322	-29.986	-25.645	-29.6235	-33.3759	-43.1792	-27.8494	-27.7766	-27.663	-23.0966	-25.0337	-38.4832	-23.5096	-33.1623	-27.5484	-25.2729	-25.7804	-23.9089	-26.2802	-24.7291	-29.0268	-25.4668	-30.7996	-30.3913	-23.889	-29.7076	-25.2689	-21.616	-23.8288	-22.0388
FMQd	-2.01056	-4.03666	-6.23239	-5.51804	-4.64838	-3.24542	-1.4456	-0.498525	-0.230717	-5.63172	-5.96571	-1.61995	-2.09286	-1.51789	-0.68792	-2.69235	-3.68708	-1.96344	-2.7841	-0.892279	-3.87907	-2.07271	-3.51286	-6.22757	-11.089	-2.87444	-3.37264	-3.20681	0.0810856	-1.70426	-8.66086	-1.17256	-6.08278	-2.94519	-1.98891	-2.05678	-1.05272	-2.19251	-1.52434	-3.63282	-1.64899	-5.05348	-3.97238	-0.783836	-4.80985	-3.16082	-2.00705	-2.59146	-1.90584
a Stratigraphic position as in Figure 2; b equilibrium conditons were calculated using our microprobe data - grain # as in Appendix 1; c average temperatures and log10 fO2 were calculated using the geothermobarometres of Spencer & Lindsley [83] and Andersen & Lindsley [84] - calculations were based on the determination of mol.% Usp and Ilm as in Carmichael [104], Andersen [105], Lindsley & Spence…
FTO, iron-titanium oxides; Ilm, ilmenite; Mag, magnetite; occur., occurrence; Usp, ulvöspinel.
[truncated: 7 more columns]

## Sheet: Table S7
Table S7: Mass balance calculations - Proportion of trace elements accounted for by Ilmenite-E1 in titanomagnetite
Sample	LDC-04	LDC-07.1	LDC-10	LDC-12.1	LDC-38.1	LDC-41	LDC47.1	LDC-49	LDC-51	LDC-52.1	LDC-52.2	LDC-54.1	LDC-54.2	LDC-56.1	LDC-56.2	LDC-58	LDC-59	LDC-61.2	LDC-62	LDC-64	LDC-68	LDC-88.2	LDC-93.1	LDC-93.2	Avg. (n=24)	Med. (n=24)	Max	Min
Position (m)a	118.3	115.6	112.6	110.7	73.5	67.2	60.6	57.9	55.9	54.8	54.6	53.3	52.6	51.3	50.7	49.4	48.3	46.3	45.1	43	39.4	14.6	1.5	1.1	-	-	-	-
Ilm (vol. %)b	32.0849	34.9523	26.2385	21.7056	32.2658	30.7535	29.5772	27.2166	24.3949	26.3921	26.2786	24.6039	25.5739	24.5996	27.7001	24.7223	24.4826	21.3979	28.1634	16.5309	25.6599	24.3623	16.5032	12.4546	25.3589	25.6169	34.9523	12.4546
Ilm (wt. %)c	30.5385	33.3435	24.8586	20.4908	30.7151	29.2404	28.0958	25.8052	23.0784	25.0072	24.8974	23.28	24.2163	23.2758	26.2736	23.3941	23.1629	20.1954	26.7229	15.5424	24.2994	23.0469	15.516	11.6726	24.0279	24.2578	33.3435	11.6726
Mg (%)	51.6893	41.4106	31.4377	28.4699	39.5924	31.267	55.2942	38.6561	35.1975	36.6849	38.5672	25.4867	39.7052	21.2089	20.7695	25.4016	21.3109	15.5205	18.3588	12.1383	12.9945	73.517	42.2254	13.0898	32.0831	31.3524	73.517	12.1383
Al	0.499895	0.226249	0.167972	0.5559	0.329845	0.163502	0.195485	0.265439	0.133919	0.18917	1.52937	0.0743138	1.85836	0.607044	0.0976009	0.111444	0.134149	0.167687	0.15513	0.0908819	0.399804	0.213226	0.263209	0.154199	0.357658	0.192327	1.85836	0.0743138
Si	6.94142	4.54677	5.60682	2.15824	18.8904	8.45975	6.11013	13.0243	17.7668	8.23346	13.6587	-	32.8125	26.619	1.41512	7.25013	2.07539	-	4.90876	-	3.39843	12.1054	6.71182	2.06646	9.75047	6.94142	32.8125	1.41512
P	15.7448	56.372	59.0829	3.57687	38.7621	48.9045	-	38.7532	22.9091	46.325	40.5904	38.5781	105.626	33.5564	36.6748	44.3625	41.426	16.2391	16.9424	6.22374	14.0206	26.764	18.2146	12.9725	34.027	36.6748	105.626	3.57687
Ca	-	23.6791	18.5047	39.6994	-	-	67.1979	27.3633	-	-	-	-	28.3307	15.8059	-	-	-	-	17.641	3.59948	16.1499	-	-	-	25.7971	21.0919	67.1979	3.59948
Sc	101.827	102.743	59.8922	79.1281	178.052	95.0075	90.0106	59.8022	60.9689	59.9724	123.005	82.8985	173.276	57.8888	35.3739	64.1932	28.9639	47.3445	2.34858	71.0309	26.0353	112.933	119.06	89.908	80.0693	75.0795	178.052	2.34858
Ti	114.609	117.155	102.703	74.0827	103.785	98.7349	86.5903	82.4215	72.9693	85.8958	93.3588	83.9326	99.6089	73.9464	73.8589	72.9849	96.2621	78.3203	84.0293	77.7416	96.041	122.228	209.433	155.161	98.1606	89.9746	209.433	72.9693
V	4.74382	7.6372	4.6347	3.62248	9.56744	6.19339	6.17539	5.76143	3.57553	5.75086	3.71038	4.71269	4.0397	4.20884	3.70516	3.91162	3.2303	3.43207	4.4485	2.27387	6.33209	5.00681	2.34003	1.93723	4.62298	4.32867	9.56744	1.93723
Cr	4.04654	4.67395	4.04168	3.02968	6.92684	2.50785	4.95807	3.53227	6.13096	5.71128	3.29287	5.27617	2.39521	3.39985	3.04039	1.80547	3.35976	2.31472	3.44228	2.5687	5.41877	2.61026	1.80851	1.28499	3.64904	3.37981	6.92684	1.28499
Mn	105.586	107.134	97.1096	67.9783	94.6098	91.7908	77.111	76.3575	68.7788	81.1489	83.766	78.6754	87.0145	68.4248	70.7842	68.0109	87.4058	73.4185	76.2998	72.1204	88.5098	117.096	182.91	120.225	89.2611	82.4574	182.91	67.9783
Co	32.0451	32.8433	20.965	19.7798	25.2544	23.9953	27.0761	24.7117	16.4945	20.9794	17.682	15.3349	15.0063	15.5318	16.1909	12.8763	17.0469	12.854	16.8285	11.3105	22.5166	29.1006	18.5532	12.472	19.8937	18.1176	32.8433	11.3105
Ni	4.521	4.38628	3.29448	2.63767	4.59718	4.52513	3.43455	4.65934	4.28821	4.0776	3.20844	2.96328	3.81232	3.74218	3.23589	3.23401	3.22113	2.73378	1.97221	1.53156	3.72213	3.61995	2.14557	3.98738	3.4813	3.52725	4.65934	1.53156
Cu	10.4105	3.14846	10.3559	13.1987	9.47408	31.0123	35.3883	31.8675	72.012	37.6396	19.4238	35.0379	37.9002	12.403	31.217	10.5607	31.3987	38.5823	48.5165	7.28895	17.7997	17.5779	21.6646	3.81572	24.4873	20.5442	72.012	3.14846
Zn	1.39095	0.975801	0.383246	3.49289	0.75914	0.304053	0.197345	0.488794	0.365643	0.598916	0.309285	0.883929	0.216642	0.406844	0.691734	0.528041	0.777561	0.577141	0.970045	0.354686	2.11044	3.85958	6.48032	5.61942	1.36427	0.645325	6.48032	0.197345
Ga	0.305888	0.613917	0.205768	0.305752	0.41287	0.294552	0.288761	0.303963	0.210237	0.232341	0.233099	0.164673	0.264776	0.229034	0.197336	0.144441	0.229735	0.174968	0.190093	0.108243	0.255386	0.295609	0.140065	0.13458	0.247337	0.231038	0.613917	0.108243
As	6.3099	25.9901	22.0131	30.3802	17.1166	33.7017	34.4381	28.8817	18.1196	19.1509	25.5595	-	47.7454	28.1506	20.0577	0.764354	29.535	47.2511	20.3982	8.69823	8.30889	17.4095	9.33924	4.02685	21.8846	20.3982	47.7454	0.764354
Y	36.5912	101.552	5.63225	23.0031	20.4377	27.2471	5.71747	7.11848	5.20763	15.5917	33.3685	5.61018	48.3074	4.39448	4.51188	12.2176	23.8159	2.89017	10.4179	-	3.1353	8.68265	7.18402	2.53422	18.0508	8.68265	101.552	2.53422
Zr	196.486	18.3311	24.0878	26.601	2.25212	9.37338	46.607	8.30273	102.037	16.8181	48.7416	37.6664	24.6646	14.0785	15.3542	31.5013	88.3801	34.2699	86.9089	8.8955	5.07897	13.9756	20.2259	12.7515	37.2245	22.1568	196.486	2.25212
Nb	748.694	485.957	459.479	366.099	220.283	245.191	108.468	123.039	649.358	149.865	242.736	200.447	125.719	75.3898	159.532	91.277	372.167	54.0381	383.13	515.486	93.3673	140.638	42.6952	251.345	262.683	210.365	748.694	42.6952
Mo	4.1252	2.80866	1.37505	4.14959	3.09346	11.2241	-	5.40596	1.83946	6.95372	4.48422	5.01343	6.68094	4.7717	5.27248	5.86908	5.64241	5.74445	4.76283	1.91794	1.42343	2.02435	1.11432	2.01969	4.24854	4.48422	11.2241	1.11432
In	79.9581	61.7117	55.2779	33.6902	100.682	72.0216	79.0755	47.0446	53.4302	64.717	92.5133	57.1512	126.168	46.3357	23.7975	48.232	34.4701	18.7675	-		58.0957	96.6975	-	-	62.4919	57.6235	126.168	18.7675
Sn	41.79	36.2954	20.2244	26.3794	24.4239	62.0625	60.1024	29.7001	17.3401	20.7237	22.73	29.7535	34.8199	36.4786	66.7818	24.8228	20.8221	28.2883	10.7519	19.2412	27.1462	36.6211	58.7421	24.8507	32.5372	27.7173	66.7818	10.7519
Sb	12.3306	18.3431	36.2219	34.3103	31.2149	27.6996	31.4172	-	-	-	-	-	-	25.1694	-	-	-	-	-	-	-	16.4087	-	-	25.9017	27.6996	36.2219	12.3306
Hf	181.31	81.9789	46.6284	34.8522	12.2088	49.1016	101.605	34.1329	99.4299	43.9608	87.1583	64.8825	55.582	43.6802	71.8807	53.2177	116.755	69.5962	91.9149	107.678	12.3015	108.654	70.8495	197.592	76.5396	70.2228	197.592	12.2088
Ta	771.326	514.921	1063.52	329.678	134.4	267.854	78.8723	107.059	308.243	118.583	355.211	161.616	120.338	75.328	151.741	88.8661	571.745	76.4172	213.08	1531.87	131.865	323.989	920.468	3511.36	497.014	240.467	3511.36	75.328
W	13.2706	74.0013	32.5719	109.545	122.045	266.803	84.0779	242.122	-	263.573	5.32439	367.815	145.749	15.7512	39.2737	50.7806	189.547	151.374	29.2404	39.4344	248.086	37.8865	22.3086	6.64499	111.184	74.0013	367.815	5.32439
Pb	0.813816	165.481	8.89845	6.6512	15.4711	14.3019	56.6422	12.4614	12.3423	76.8919	16.7147	12.5403	78.1714	9.39192	1.33621	13.9382	6.59662	1.645	25.9502	13.1433	4.08626	19.5109	1.11764	-	24.9608	12.5403	165.481	0.813816
a Stratigraphic position as in Figure 2; b calculated assuming an average spinel content in titanomagnetite of 2.6 vol. % (see text for details); c calculated assuming the following specific density: magnetite = 5.2, ilmenite = 4.8, herycnite-gahnite = 4.1.
The proportion of trace elements accounted for by Ilmenite-E1 in titanomagnetite was calculated using the Equation 7 in the text.

[truncated: 1 more sheets: Table S8]
